1 **Newfound coding potential of transcripts unveils missing members of**  
2 **human protein communities**

3

4 Sebastien Leblanc<sup>1,2</sup>, Marie A Brunet<sup>1,2</sup>, Jean-François Jacques<sup>1,2</sup>, Amina M Lekehal<sup>1,2</sup>, Andréa  
5 Duclos<sup>1</sup>, Alexia Tremblay<sup>1</sup>, Alexis Bruggeman-Gascon<sup>1</sup>, Sondos Samandi<sup>1,2</sup>, Mylène Brunelle<sup>1,2</sup>,  
6 Alan A Cohen<sup>3</sup>, Michelle S Scott<sup>1</sup>, Xavier Roucou<sup>1,2,\*</sup>

7 <sup>1</sup>Department of Biochemistry and Functional Genomics, Université de Sherbrooke, Sherbrooke,  
8 Quebec, Canada.

9 <sup>2</sup>PROTEO, Quebec Network for Research on Protein Function, Structure, and Engineering.

10 <sup>3</sup>Department of Family Medicine, Université de Sherbrooke, Sherbrooke, Quebec, Canada.

11

12 \*Corresponding author: Tel. (819) 821-8000x72240; E-Mail: [xavier.roucou@usherbrooke.ca](mailto:xavier.roucou@usherbrooke.ca)

13

14

15 **Running title: Alternative proteins in communities**

16

17 **Keywords: alternative proteins, protein network, protein-protein interactions, pseudogenes,**  
18 **affinity purification-mass spectrometry**

19

20

## 21 **Abstract**

22

23 Recent proteogenomic approaches have led to the discovery that regions of the transcriptome  
24 previously annotated as non-coding regions (i.e. UTRs, open reading frames overlapping  
25 annotated coding sequences in a different reading frame, and non-coding RNAs) frequently  
26 encode proteins (termed alternative proteins). This suggests that previously identified protein  
27 communities are partially incomplete since alternative proteins are not present in conventional  
28 protein databases. Here we incorporate this increased diversity in the re-analysis of a high  
29 throughput human network proteomics dataset thereby revealing the presence of 203  
30 alternative proteins within 163 distinct communities associated with a wide variety of cellular  
31 functions and pathologies. We found 19 genes encoding both an annotated (reference) and an  
32 alternative protein interacting with each other. Of the 136 alternative proteins encoded by  
33 pseudogenes, 38 are direct interactors of reference proteins encoded by their respective  
34 parental gene. Finally, we experimentally validate several interactions involving alternative  
35 proteins. These data improve the blueprints of the human protein-protein interaction network  
36 and suggest functional roles for hundreds of alternative proteins.

37

38

39

40

## 41 **Introduction**

42

43 Cellular functions depend on myriads of protein communities acting in consort, and  
44 understanding cellular mechanisms on a large scale will require a relatively exhaustive catalog of  
45 protein-protein interactions. Hence, there have been major efforts to perform high throughput  
46 experimental mapping of physical interactions between human proteins (Luck *et al*, 2017). The  
47 methodologies involve binary interaction mapping using yeast 2-hybrid (Rolland *et al*, 2014),  
48 biochemical fractionation of soluble complexes combined with mass spectrometry (Wan *et al*,  
49 2015), and affinity-purification coupled with mass-spectrometry (Huttlin *et al*, 2015, 2017; Liu *et*  
50 *al*, 2018).

51

52 In parallel to these experimental initiatives, computational tools were developed to help  
53 complete the human interactome (Keskin *et al*, 2016). Such tools are particularly useful for the  
54 identification of transient, cell-type or environmentally dependent interactions that escape  
55 current typical experimental protocols. Computational methods that can be used at large scales  
56 are created and/or validated using protein-protein interactions previously obtained  
57 experimentally (Keskin *et al*, 2016; Kovács *et al*, 2019). Thus, although computational tools  
58 complement experimental approaches, the experimental detection of protein-protein  
59 interactions is key to building a comprehensive catalog of interactomes.

60

61 The BioPlex network is the largest human proteome-scale interactome; initially, BioPlex 1.0  
62 reporting 23744 interactions among 7668 proteins was followed by BioPlex 2.0, which forms the  
63 basis of the current study, with 56553 interactions reported involving 10961 proteins. Recent  
64 pre-print BioPlex 3.0 reached 118162 interactions among 14586 proteins in HEK293T cells

65 (Huttlin *et al*, 2017, 2015, 2020). The enrichment of interactors of roughly half of currently  
66 annotated (or reference) human proteins allowed the authors to functionally contextualize  
67 poorly characterized proteins, identify communities of tight interconnectivity, and find  
68 associations between disease phenotypes and these protein groups. In addition, pre-print  
69 BioPlex now provides a first draft of the interactome in HCT116 cells (Huttlin *et al*, 2020).  
70  
71 The experimental strategy behind BioPlex is based on the expression of each protein-coding  
72 open reading frame (ORF) present in the human ORFeome with an epitope tag, the affinity  
73 purification of the corresponding protein, and the confident identification of its specific protein  
74 interactors by mass spectrometry. The identification of peptides and proteins in each protein  
75 complex is performed using the Uniprot database. Hence, only proteins and alternative splicing-  
76 derived protein isoforms annotated in the Uniprot database can be detected. Using this  
77 common approach, the human interactome is necessarily made up of proteins already  
78 annotated in the Uniprot database, precluding the detection of novel unannotated proteins. Yet,  
79 beyond isoform derived proteomic diversity, multiple recent discoveries point to a general  
80 phenomenon of translation events of non-canonical ORFs in both eukaryotes and prokaryotes,  
81 including small ORFs and alternative ORFs (altORFs) (Brunet *et al*, 2020b; Orr *et al*, 2020).  
82 Typically, small ORFs are between 10 and 100 codons, while altORFs can be larger than 100  
83 codons. Here, we use the term altORFs for non-canonical ORFs independently of their size. On  
84 average, altORFs are ten times shorter than conventional annotated ORFs but several thousands  
85 are longer than 100 codons (Samandi *et al*, 2017). AltORFs encode alternative proteins (altProts)  
86 and are found both upstream (i.e. 5'UTR) and downstream (i.e. 3'UTR) of the reference coding  
87 sequence as well as overlapping the reference coding sequence in a shifted reading frame within  
88 mRNAs (Fig 1A-B). Additionally, RNAs transcribed from long non-coding RNA genes and

89 pseudogenes are systematically annotated as non-coding RNAs (ncRNAs); yet, they may also  
90 harbor altORFs and encode alternative proteins (Samandi *et al*, 2017). Consequently, the  
91 fraction of multi-coding or polycistronic human genes and of protein-coding “pseudogenes” may  
92 have been largely underestimated. AltORFs translation events are experimentally detected by  
93 ribosome profiling (Orr *et al*, 2020), a method that detects initiating and/or elongating  
94 ribosomes at the transcriptome wide level (Ingolia *et al*, 2019). Alternatively, large-scale mass  
95 spectrometry detection of alternative proteins requires first the annotation of altORFs and then  
96 *in-silico* translation of these altORFs to generate customized protein databases containing the  
97 sequences of the corresponding proteins (Delcourt *et al*, 2017). This integrative approach,  
98 termed proteogenomics, has emerged as a new research field essential to better capture the  
99 coding potential and the diversity of the proteome (Nesvizhskii, 2014; Ruggles *et al*, 2017).

100

101 The translation of altORFs genuinely expands the proteome, and proteogenomics approaches  
102 using customized protein databases allows for routine MS-based detection of altProts (Brunet *et*  
103 *al*, 2019; Delcourt *et al*, 2018). In order to uncover altProts otherwise undetectable using the  
104 UniProt database we re-analyzed the raw MS-data from the BioPlex 2.0 interactome with our  
105 OpenProt proteogenomics database.

106

107 OpenProt contains the sequences of proteins predicted to be encoded by all ORFs larger than 30  
108 codons in the human transcriptome. This large ORFeome includes ORFs encoding proteins  
109 annotated by NCBI RefSeq, Ensembl and Uniprot, termed here reference proteins or refProts. It  
110 also includes still unannotated ORFs that encode novel isoforms sharing a high degree of  
111 similarity with refProts from the same gene. Finally, the third category of ORFs, termed altORFs,  
112 potentially encode altProts and shares no significant sequence similarity with a refProt from the

113 same gene (Table 1). OpenProt is not limited by the three main assumptions that shape current  
114 annotations: (1) a single functional ORF in each mRNA, typically the longest ORF; (2) RNAs with  
115 ORFs shorter than 100 codons are typically annotated as ncRNAs; and (3) RNAs transcribed from  
116 genes annotated as pseudogenes are automatically annotated as ncRNAs. Thus, in addition to  
117 proteins present in NCBI RefSeq, Ensembl and Uniprot, OpenProt also contains the sequence for  
118 novel proteins, including novel isoforms and alternative proteins (Brunet *et al*, 2019, 2020c).

119

120 Using OpenProt, we were able to detect and map altProts within complexes of known proteins  
121 which increased protein diversity by including a higher number of small proteins. In addition, the  
122 data confirmed the significant contribution of pseudogenes to protein networks with 124 out of  
123 280 altProts encoded by genes annotated as pseudogenes. We also detected many interacting  
124 proteins encoded either by the same gene or by a pseudogene and its corresponding parental  
125 gene. In sum, this work improves our knowledge of both the coding potential of the human  
126 transcriptome and the composition of protein communities by bringing diversity (i.e. small  
127 proteins) and inclusivity (i.e. proteins encoded in RNAs incorrectly annotated as ncRNAs) into  
128 the largest human protein-protein interaction (PPI) network to date.

129

130

## 131 **Results**

132

### 133 ***Re-analysis of BioPlex 2.0 mass spectrometry data and identification of preyed alternative***

#### 134 ***proteins***

135 We employed the OpenProt proteogenomics library in the re-analysis of high throughput AP-MS  
136 experiments from the BioPlex 2.0 network. Given the size of the OpenProt database (Fig 1C), the  
137 false discovery rate (FDR) for protein identification was adjusted from 1 % down to 0.001 % to  
138 mitigate against spurious identifications (Brunet *et al*, 2019). Such stringent FDR settings  
139 inevitably lead to fewer prey proteins identified; thus, our highly conservative methodology is  
140 likely to leave behind many false negatives. The BioPlex 2.0 network is built in a gene-centric  
141 manner in order to simplify the analysis by making abstraction of protein isoforms. In the  
142 current analysis, all refProts and their isoforms are also grouped under their respective gene,  
143 but results concerning altProts are necessarily given at the protein level.

144

145 In total, 434 unannotated proteins from 418 genes and 5669 refProts were identified in the re-  
146 analysis of raw MS data from the pull-down of 3033 refProts (baits), using a combination of  
147 multiple identification algorithms (Fig 1C). Since these identifications resulted from the re-  
148 analysis of raw MS data from BioPlex 2.0 with the OpenProt MS pipeline, we sought to  
149 determine the overlap between total sets of genes identified. RefProts from 4656 genes (or 86  
150 % of total re-analysis results) were found in both the BioPlex 2.0 and in the present work (Fig  
151 EV1A), indicating that the re-analysis could reliably reproduce BioPlex results.

152

153 Our stringent approach in the identification of altProts included the use of PepQuery to validate  
154 protein detection using a peptide-centric approach (Wen *et al*, 2019). This tool includes a step

155 which verified that altProt-derived peptides were supported by experimental spectra that could  
156 not be better explained by peptides from refProts with any post-translational modification. In  
157 addition, peptides were screened for isobaric substitutions in order to reject dubious peptides  
158 that could match refProts (Choong *et al*, 2017). A total of 295 altProt identifications were  
159 validated with PepQuery including 136 altProts encoded by pseudogenes (Table EV1). MS-based  
160 identification of short proteins with a minimum of 2 unique suitable tryptic peptides remains an  
161 important challenge and the majority of short proteins are typically detected with a single  
162 unique peptide (Slavoff *et al*, 2013; Ma *et al*, 2014). Of the 295 altProts validated by PepQuery  
163 (Table EV2), 63 complied with the Human Proteome Project PE1 level for proteins with strong  
164 protein-level evidence, Guidelines v3.0 (Deutsch *et al*, 2019).

165

166 As expected, detected altProts were much shorter than refProts with a median size of 78 amino  
167 acids versus 474 (Fig 1D; Table EV1). AltORFs encoding the 295 detected and PepQuery-  
168 validated altProts were distributed among 1029 transcripts (Table EV1) and in addition to the  
169 136 pseudogenes derived altProts, 38 were exclusively encoded by genes of non-coding  
170 biotypes (Fig 1E). A third were found in transcripts already encoding a refProt (Fig 1E), indicating  
171 that the corresponding genes are in fact either bicistronic (two non-overlapping ORFs) or dual-  
172 coding (two overlapping ORFs) (Table EV1). Of the altProts encoded by transcripts from genes of  
173 protein coding biotype, most were encoded by a frame-shifted altORF overlapping the  
174 annotated coding sequence or downstream of the annotated coding sequence in the 3'UTR (Fig  
175 1F). The remaining altORFs were encoded by 5'UTRs or by transcripts annotated as non-coding  
176 but transcribed from those genes of protein coding biotype. From the localization of altORFs  
177 relative to the canonical CDS in the 107 mRNA from protein coding genes we conclude that 56 of  
178 those genes are in fact bicistronic and 51 are dual-coding (Table EV1). In addition, transcripts



179 from 7 pseudogenes have been found to encode two altProts suggesting that 3 of them are in  
180 fact dual coding and 4 are bicistronic (Table EV1).

181

182 We collected protein orthology relationships from 10 species computed by OpenProt (Fig 1G).

183 Although 100 altProts were specific to humans, a large number had orthologs in the mouse and

184 chimpanzee, and 28 were even conserved through evolution since yeast. 167 altProts displayed

185 at least one functional domain signature (InterProScan, version 5.14-53.0, (Mitchell *et al*, 2019)),

186 further supporting their functionality (Table EV1).

187

### 188 **Network assembly**

189 After identification of prey proteins, CompPASS was used to compute semi-quantitative

190 statistics based on peptide-spectral matches across technical replicates (Sowa *et al*, 2009).

191 These metrics allow filtration of background and spurious interactions from the raw

192 identifications of prey proteins to obtain high confidence interacting proteins (HCIP). To mitigate

193 against the otherwise noisy nature of fast-paced high throughput approaches and to filter prey

194 identifications down to the most confident interactions, we applied a Naïve Bayes classifier

195 similar to CompPASS Plus (Huttlin *et al*, 2015). The classifier used representations of bait-prey

196 pairs computed from detection statistics and assembled into a vector of 9 features as described

197 by (Huttlin *et al*, 2015). High confidence interactions reported by BioPlex 2.0 served as target

198 labels. HCIP classification resulted in the retention of 3.6 % of the starting set of bait-prey pairs

199 identified (Fig EV1C). Notably, 815 baits from the original dataset were excluded after filtration

200 because no confident interaction could be distinguished from background.

201

202 Following protein identifications and background filtration, the network was assembled by  
203 integrating all bait-prey interactions into one network (Fig 2A). All refProts and their isoforms  
204 were grouped under their respective gene, similar to the BioPlex analysis, but separate nodes  
205 are shown for altProts. In total, the re-analysis with OpenProt found 5650 prey proteins from  
206 the purification of 2218 bait proteins altogether engaged in 14029 interactions, the majority  
207 (59.1 %) of which were also reported by BioPlex 2.0 (Fig 2B). The average number of interactions  
208 per bait was 7.1. Among prey proteins, 280 altProts were found engaged in 347 interactions  
209 with 292 bait proteins.

210

211 Compared to BioPlex 2.0, a smaller total number of protein identification was expected because  
212 the OpenProt MS analysis pipeline is more stringent with a tolerance of 20 ppm on peak  
213 positions rather than 50 ppm and a 0.001 % protein FDR as opposed to 1 %. Indeed, we  
214 identified 14029 interactions in our reanalysis, compared to 56553 interactions reported by  
215 BioPlex 2.0 (Fig 2B). Among the 14029 interactions, 8288 (59.1 %) were also reported by BioPlex  
216 2.0, and 7979 (56.8 %) were reported in the recently released (but not yet peer reviewed)  
217 BioPlex 3.0 (Fig 2B). Interestingly, 11329 interactions (20 %) from BioPlex 2.0 were not  
218 confirmed in BioPlex 3.0 using a larger number of protein baits, although the same experimental  
219 and computational methodologies were used (Fig 2B). This observation illustrates the challenge  
220 in the identification of protein-protein interactions with large-scale data given the relatively low  
221 signal to noise ratio in AP-MS data.

222

### 223 ***Network structural features and alternative protein integration***

224 Network theoretic analysis confirmed that the OpenProt-derived network displayed the  
225 expected characteristics of natural networks. Variability in the number of interacting partners of

226 a given protein in a network (node degree) is typically very wide and the degree distribution that  
227 characterizes this variation follows a power-law (Bianconi & Barabási, 2001). Similar to other  
228 protein networks, the degree distribution of the OpenProt-derived network also fitted a power-  
229 law, an indication that the vast majority of proteins have few connections and a minor fraction is  
230 highly connected (also called hubs) (Fig 2C). The degree of connectivity of altProts varied  
231 between 1 and 7 whereas that of refProt was between 1 and 84. On the one hand, since long  
232 and multidomain proteins are over-represented among hub proteins (Ekman *et al*, 2006), this  
233 difference may be explained by the fact that altProts in the network were on average 6 times  
234 shorter than refProts (Fig 1D). On the other hand, none of the altProts were used as baits which  
235 also explains their lower observed connectivity since average degree was 2.5 for preys but 7.1  
236 for baits.

237

238 The mean degrees of separation between any two proteins in the OpenProt-derived network  
239 was 5 (Fig 2D), in agreement with the small-world effect that characterizes biological networks  
240 (Wagner & Fell, 2001).

241

242 Centrality analysis allows us to sort proteins according to their relative influence on network  
243 behaviour where the most central proteins tend to be involved in the most essential cellular  
244 processes (Jeong *et al*, 2001). Here, the eigenvector centrality measure indicates that altProts  
245 are found both at the network periphery connected to refProts of lesser influence as well as  
246 connected to central refProts of high influence (Fig 2E).

247

248 Known complexes from the CORUM database were mapped onto the network to assess the  
249 portion of complex subunits identified in the re-analysis (Table EV3). In most cases a majority

250 were recovered (75 % of complexes showed  $\geq 50$  % recovery) (Fig 2F). We observed 50 altProts  
251 in the neighborhood of CORUM complex subunits that served as bait. Here multiple interesting  
252 patterns of altProt interactions were already noticeable: (1) altProts detected in the interactome  
253 of their respective refProts (Fig 2Gi), (2) altProts originating from pseudogenes and detected in  
254 the interactome of refProts encoded by the parental gene (Fig 2Gii-iii) and (3) altProts from  
255 protein coding genes or pseudogenes detected in network regions outside the immediate  
256 neighborhood of the related protein/gene (Fig 2Giv-vi).

257

258 The OpenProt-derived protein-protein interaction network displayed with a degree sorted circle  
259 layout showed that preyed altProts generally had a lower degree of connectivity compared to  
260 refProts (Fig 3A). This might be expected in part because no altProts were used as baits in the  
261 network, but also based on the limited range of binding capacity due to their smaller size. In  
262 order to investigate the local neighborhood of altProts, subnetworks were extracted by taking  
263 nodes within shortest path length of 2 and all edges between these for each altProt (here called  
264 second neighborhood). Notable altProts with high degree include OpenProt accessions  
265 IP\_117582, a novel protein encoded by an altORF overlapping the reference coding sequence in  
266 the *BEND4* gene (Fig 3Ai), and IP\_711679, encoded in a transcript of the *SLC38A10* gene  
267 currently annotated as a ncRNA (Fig 3Aii). Although these two altProts would not qualify as hub  
268 proteins per say, they seem to participate in the bridging of hubs from otherwise relatively  
269 isolated regions. Several other examples of altProts encoded by a lncRNA gene (Fig 3Aiii), in  
270 pseudogenes (Fig 3Aiv, v, vii, viii), and in protein-coding genes (Fig 3Avi, ix) integrate the  
271 network with a variety of topologies. One of these subnetworks features IP\_710744, a recently  
272 discovered altProt and polyubiquitin precursor with 3 ubiquitin variants, encoded in the *UBBP4*  
273 pseudogene (Dubois *et al*, 2020). The ubiquitin variant Ubbp4<sup>A2</sup> differs from canonical ubiquitin

274 by one amino acid(T55S) and can be attached to target proteins (Dubois *et al*, 2020). Before  
275 network assembly this variant was identified reproducibly (across technical replicates) in the  
276 purification of 11 baits. Following HCIP identifications, only 3 interactions remained (Fig 3Aiv),  
277 likely because widespread identifications lead the Naïve Bayes classifier to assume non-  
278 specificity for those showing lower abundance. The 3 interactors include 2 ubiquitin ligases  
279 (*UBE2E2* (Q96LR5) and *UBE2E3* (Q969T4)) and *USP48* (Q86UV5), a peptidase involved in the  
280 processing of ubiquitin precursors.

281

282 After observing second neighborhoods of altProts we sought to evaluate the effect of altProt  
283 inclusion into local neighborhoods of refProts. To do so we computed the eigenvector centrality  
284 of each refProt within their own second neighborhood extracted from the assembled network  
285 with and without altProts. This analysis highlighted *ELP6* which undergoes a marked reduction in  
286 eigenvector centrality in its second neighbourhood (0.67 versus 0.56) when the altProt  
287 IP\_688853 (encoded by the ‘non-coding’ gene AC092329.4) is included (Fig 3Bi,ii). This shows  
288 that node influence in this region of the network is poorly understood and that identifications of  
289 novel interactors may shed light over the recent association of this gene with tumorigenesis  
290 (Close *et al*, 2012).

291

292 In total, 45 pseudogene-encoded altProts were uncovered in the direct interactome of refProts  
293 from their respective parental genes (Table EV4, shortest path length of 1), of which 2 more  
294 examples are illustrated with more details in Fig 3C.

295 *GAPDH* is known to have a large number of pseudogenes (Liu *et al*, 2009). Yet protein products  
296 originating from 9 *GAPDH* pseudogenes were confidently identified in the purification of the  
297 canonical GAPDH protein (Fig 3Ci). Since the glycolytic active form of this enzyme is a tetramer,

298 we conjecture that GAPDH tetramers may assemble from a heterogenous mixture of protein  
299 products from the parental gene and many of its pseudogenes. GAPDH is a multifunctional  
300 protein (Tristan *et al*, 2011); although different posttranslational modifications may explain in  
301 part how this protein switches function (Colell *et al*, 2009), it is possible that heterologous and  
302 homologous complexes contribute to GAPDH functional diversity. Especially given that 4 of the  
303 smallest protein products from *GAPDH* pseudogenes only contain the GAPDH NAD binding  
304 domain (IPR020828; IP\_735797, IP\_761275, IP\_735800, IP\_591881), the protein encoded by  
305 *GAPDHP1* only contains the GAPDH catalytic domain (IPR020829; IP\_560713), while the largest  
306 proteins from *GAPDH* pseudogenes contain both domains (IP\_557819, IP\_672168, IP\_3422225,  
307 IP\_755869) (Table EV1). The *PHB1* subnetwork highlights an interaction between *PHB1* and  
308 *PHBP19*, one of the 21 *PHB* pseudogenes (Fig 3Bii). *PHB1* and *PHB2* are paralogs and the  
309 proteins they encode, PHB1 and PHB2, heterodimerize; similar to GAPDH, the PHB1/PHB2  
310 complex is multifunctional (Osman *et al*, 2009), and the dimerization of PHB1 or PHB2 with  
311 *PHBP19*-derived IP\_762813, which also contains a prohibitin domain (IPR000163), may regulate  
312 the various activities of the complex.

313

314 We reasoned that pseudogene-derived altProts directly interacting with their parental gene-  
315 derived refProts (parental protein) may result from the generally high degree of sequence  
316 similarity, particularly for refProts known to multimerize. However, although a slight reduction  
317 of alignment scores was observed with an increase in degrees of separation, the 45 altProts  
318 directly interacting with parental protein display a large variety of sequence alignment scores  
319 (Fig 3Di). This suggests that direct interactions between pseudogene-derived altProts and their  
320 respective parental refProts involve other mechanisms in addition to sequence identity. Since 42

321 of the 45 altProts share between 1 and 7 InterPro entries with their respective parental proteins  
322 (Table EV4), protein domains may be an important mechanism driving these interactions.

323

324 The mean degrees of separation between a refProt and an altProt encoded in the same gene  
325 reveals two types of relationships (Fig 3Dii). 25 % (18) of altProt-refProt pairs have a degree of  
326 separation of 1, that is to say these altProts were found in the direct interactome of the  
327 corresponding refProt from the same gene. Hence, these protein pairs encoded by the same  
328 genes are clearly involved in the same function through direct or indirect physical contacts.  
329 Interestingly, 15 of these 18 altProts are encoded by dual-coding genes, i.e. with altORFs  
330 overlapping annotated CDSs. 75 % of altProt-refProt pairs follow a distribution of degrees of  
331 separation similar to the whole network (compare Fig 3Dii and 2D). This suggests that they are  
332 not more closely related than any other 2 proteins in the network despite shared transcriptional  
333 regulation.

334

### 335 ***Cluster detection reveals altProts as new participants in known protein communities***

336 Biological networks are organised in a hierarchy of interconnected subnetworks called clusters  
337 or communities. To identify these communities, unsupervised Markov clustering (MCL) (Enright  
338 *et al*, 2002) was used similarly to methodology applied to BioPlex 2.0 (Huttlin *et al*, 2017).

339 Partitioning of the network resulted in 1045 protein clusters, 163 of which contained at least  
340 one altProt (Fig 4A). The size of altProts in these communities varied between 29 to 269 amino  
341 acids indicating that protein length may not be a limiting factor in their involvement in  
342 functional groups. Links between clusters were drawn where the number of connections  
343 between members of cluster pairs was higher than expected (detailed in Materials and  
344 Methods).

345

346 In order to assign biological function to these clusters, and therefore generate testable  
347 hypotheses about the function of altProts detected among them, enrichment of gene ontology  
348 (GO) terms was computed for each community against the background of all human genes.  
349 Several communities of different sizes showing significant GO term enrichment are detailed in  
350 Fig 4B.

351

352 45 % of identified clusters showed GO term enrichment. The same analysis with the original  
353 BioPlex network showed 57 % of clusters with GO term enrichment; possibly because a higher  
354 number of protein identifications yielded a larger network and therefore a higher probability of  
355 significant enrichment.

356

357 The altProt IP\_293201 from the gene *RNF215* was identified as a novel interactor of three  
358 subunits of the RNA exosome multisubunit complex (cluster #46), suggesting a possible role in  
359 RNA homeostasis. Clusters #214 and #369 included protein communities with essential  
360 activities: the large eukaryotic initiation factor EIF3 and the recently discovered KICSTOR  
361 complex, a lysosome-associated negative regulator of mTORC1 signaling (Wolfson *et al*, 2017,  
362 1). At least one pseudogene encoded altProt was detected in each of these clusters. Intriguingly,  
363 altProts IP\_790907 (cluster #214) and IP\_602155 (cluster #369) interact with the parental  
364 proteins EIF3E and ITFG2, respectively. These altProts may either compete with the parental  
365 proteins to change the activity of the complexes, or function as additional subunits since each  
366 contains a relevant functional domain (initiation factor domain, IPR019382, and ITFG2 domain,  
367 PF15907, respectively). Several subunits of the spliceosome are present in cluster #15, a protein  
368 community that includes IP\_637160, a novel interactor of SNRPA1, which contains a



369 U2A'/phosphoprotein 32 family A domain (IPR003603) where U2A' is a protein required for the  
370 spliceosome assembly (Caspary & Séraphin, 1998). Cluster #115 contains the two regulatory  
371 subunits of PKA, PRKAR1B and PRKAR2B, which form a dimer, and several A-kinase scaffold  
372 proteins that anchor this dimer to different subcellular compartments (Di Benedetto *et al*,  
373 2008). Three altProts interacting with PRKAR2B are also present in this cluster. Interestingly,  
374 altProt IP\_156019 is encoded by an altORF overlapping the canonical PRKAR2B coding sequence;  
375 hence, *PRKAR2B* is a dual-coding gene with both proteins, the refProt and the altProt,  
376 interacting with each other. The discovery of new altProts in known protein communities  
377 demonstrates a potential for the increase in our knowledge of biological complexes.

378

### 379 ***Disease association***

380 The curated list of disease-gene associations published by DisGeNET relates 6,970 genes with  
381 8,141 diseases in 32,375 associations (Piñero *et al*, 2020). After mapping this gene-disease  
382 association network onto our network of protein communities, 804 clusters of which 116  
383 contained at least one altProt were found in association with 3,668 diseases (Fig 5A). The 116  
384 gene-disease associations involving at least one altProt were distributed among 22 disease  
385 classes (Fig 5B). The distribution of disease-cluster associations involving altProts among the  
386 disease classes was similar to those involving refProts. Thus, no preferential association of  
387 altProts with certain disease classes could be observed.

388

389 A selection of subnetworks illustrates how altProts associate with different diseases (Fig 5C).  
390 *ADAM10* encodes a transmembrane refProt with metalloproteinase activity. Among protein  
391 substrates that are cleaved by ADAM10 and shed from cells, some act on receptors and activate  
392 signaling pathways important in normal cell physiology (Reiss & Saftig, 2009). Overexpression of

393 this protease or increased shedding of tumorigenic proteoforms results in overactivation of  
394 signaling pathways and tumorigenesis (Murphy, 2008; Smith *et al*, 2020). IP\_233890 is an altProt  
395 expressed from bicistronic *ADAM10* and its association with a subnetwork of transcription  
396 factors involved in tumorigenesis may further clarify the role of that gene in cancer (Fig 5Ci).  
397 Cluster #199 illustrates the association of a pair of refProt/altProt expressed from the same  
398 dual-coding gene, *ZNF408*, with three different diseases (Fig 5Cii). The implication of  
399 pseudogene-derived altProts is emphasized by the association of three of them with Acute  
400 Myelocytic Leukemia through their interaction with *ANXA2* (Fig 5C iii). Two of these interactions  
401 occur between a refProt from the parental gene and altProts encoded by two of its  
402 pseudogenes.

403

404 Cluster #133 relates proteins localized at the membrane with roles in intercellular signaling,  
405 development and organogenesis, as well as fatty acids transport proteins (Mahesh, 2013; Drazyk  
406 *et al*, 2019; Short *et al*, 2007, 1; Kim *et al*, 2020). AltProt IP\_656413 associated with this cluster is  
407 coded by a pseudogene of the breakpoint cluster protein BCR, a Rho GTPase activating protein.  
408 IP\_656413 is predicted to have a Rho GTPase activating protein domain InterProScan analysis  
409 (IPR000198) (Table EV1). Associations of this cluster with diseases both common (bronchial  
410 hypersensitivity) and rare (Fraser syndrome) highlight the potential of deeper protein coding  
411 annotations coupled with network proteomic studies to unveil novel members relevant to a  
412 wide array of pathological phenotypes. Characterization of the role of this altProt at the  
413 membrane, likely involved in intercellular signaling, may yield mechanistic insight surrounding  
414 associated pathologies.

415

416 ***Functional validation of protein-protein interactions involving an alternative protein***

417 Interactions representative of the three following classes of complexes involving altProts were  
418 selected for further experimental validation: an altProt encoded by a dual-coding gene and  
419 interacting with the respective refProt, an altProt expressed from a pseudogene and interacting  
420 with the refProt encoded by the parental gene, and an altProt interacting with a refProt coded  
421 by a different gene.

422

423 The dual-coding *FADD* gene expresses altProt IP\_198808 in addition to the conventional FADD  
424 protein, and both proteins interact within the DISC complex (Fig 2Gi). We took advantage of a  
425 previous study aiming at the identification of the FADD interactome to test whether this altProt  
426 may also have been missed in this analysis because the protein database used did not contain  
427 altProt sequences (Eyckerman *et al*, 2016). In this work, the authors developed a new method  
428 called ViroTrap to isolate native protein complexes within extracellular virus-like particles to  
429 avoid artefacts of cell lysis in AP-MS. Among the baits under study FADD was selected to isolate  
430 the native FADD complex. First, we used the peptide-centric search engine PepQuery to directly  
431 test for the presence or the absence of IP\_198808-derived specific peptides in the FADD  
432 complex datasets. Rather than interpreting all MS/MS spectra, this approach tests specifically  
433 for the presence of the queried peptides (Ting *et al*, 2015). Indeed, two unique peptides from  
434 IP\_198808 were detected in each of the replicates of that study via PepQuery (Fig EV3A i,v).  
435 Second, we used a conventional spectrum-centric and database search analysis with the UniProt  
436 database to which was added the sequence of IP\_198808. The altProt was identified in the  
437 FADD interactome (Fig EV3B) with 4 unique peptides (Fig EV3A i,iii,iv,v). In transfected cells,  
438 FADD formed large filaments (Fig 6A, right), previously labelled Death Effector Filaments (Siegel  
439 *et al*, 1998). IP\_198808 co-localized in the same filaments in the nucleus, while the cytosolic  
440 filaments contained FADD only. Finally, this interaction was validated by co-

441 immunoprecipitation (Fig 6A, left). These proteomics, microscopic and biochemical approaches  
442 confirmed the interaction between the two proteins encoded in dual-coding *FADD*.  
443  
444 Next, we selected 2 pairs of interactions of an altProt expressed from a pseudogene with a  
445 refProt expressed from the corresponding parental gene. The interaction between altProt  
446 IP\_624363 encoded in the *EEF1AP24* pseudogene and EEF1A1 (Fig 3Av) was confirmed by co-  
447 immunoprecipitation (Fig 6B, left). Both proteins also displayed strong co-localization signals (Fig  
448 6B, right). In order to validate the interaction between *PHBP19*-encoded IP\_762813 and PHB1,  
449 we performed two experiments. First, PHB1-GFP co-immunoprecipitated with IP\_762813 (Fig  
450 6C, left). Second, we performed independent AP-MS experiments for both IP\_762813 and PHB1  
451 in HEK293 cells. We confirmed the presence of PHB1 in the interactome of IP\_762813 and the  
452 presence of IP\_762813 in the interactome of PHB1 (Fig 6D, right). Interestingly, we observed  
453 shared interactors between IP\_762813 and PHB1 (IRS4 (O14654), ATP1A1 (P05023) and XPO1  
454 (O14980)), as well as interactors specific to each. Prey-prey interactions from STRING also  
455 showed a certain interconnectivity of both interactomes, whilst each retained unique  
456 interactors (Fig EV3C).  
457  
458 The altProt IP\_117582 encoded in the *BEND4* gene is one of the most central and most  
459 connected alternative proteins in our network (Fig 3A). The interaction with RPL18 was tested  
460 and confirmed by co-immunoprecipitation (Fig 6D, left), and their co-localization was also  
461 confirmed by immunofluorescence (Fig 6D, right).  
462  
463

## 464 **Discussion**

465

466 The discovery of unannotated altProts encoded by ORFs localized in “non-coding” regions of the  
467 transcriptome raises the question of the function of these proteins. The translation of altProts  
468 may result from biological translational noise producing non-bioactive molecules. Alternatively,  
469 altProts may play important biological roles (Orr *et al*, 2020). Here, we addressed the issue of  
470 the functionality of altProts by testing their implication in protein-protein interactions. We have  
471 reanalyzed the Bioplex 2.0 proteo-interactomics data using the proteogenomics resource  
472 OpenProt which provides customized databases for all ORFs larger than 30 codons in 10 species  
473 (Brunet *et al*, 2019, 2020c). Under stringent conditions, a total of 295 prey altProts were  
474 detected, of which 280 could be confidently mapped in the network of 292 bait refProts. 136  
475 altProts are expressed from pseudogenes, 121 from dual-coding and bicistronic genes, and 38  
476 from transcripts annotated as ncRNA but should in fact be protein-coding. In addition to  
477 revealing new members of protein communities, this study lends definitive support to the  
478 functionality of hundreds of altProts and provides avenues to investigate their function.

479

480 The detection of 295 altProts under stringent conditions confirms the hindrance introduced by  
481 three assumptions of conventional annotations: (1) eukaryotic protein-coding genes are  
482 monocistronic; (2) RNAs transcribed from genes annotated as pseudogenes are ncRNAs; and (3)  
483 ncRNAs are annotated as such based on non-experimental criteria, including the largely used  
484 100 codons minimal length (Dinger *et al*, 2008). The persistence of these assumptions in  
485 conventional genomic annotations limits the repertoire of proteins encoded by eukaryotic  
486 genomes (Brunet *et al*, 2018). It remains possible that functional altORFs in regions of the  
487 transcriptome annotated as non-coding are exceptions and that a large fraction of genes and

488 RNAs comply with current assumptions. However, an ever-increasing number of  
489 proteogenomics studies demonstrate that thousands of altORFs and their corresponding  
490 proteins are translated (Samandi *et al*, 2017; Chen *et al*, 2020).  
491  
492 Conventional annotations introduce some confusion by opting to create a new gene entry  
493 within a previously annotated gene where a novel protein product has been reported or where  
494 novel transcripts have been mapped, rather than annotate a second ORF in the initial gene. The  
495 result is that some genomic regions have been assigned a second gene in the same orientation,  
496 nested within a previously annotated gene. This is the case for pseudogene *ENO1P1* (Ensembl:  
497 ENSG00000244457; genomic location: chr1: 236,483,165-236,484,468 (GRCh38.p13)) which  
498 overlaps the protein coding gene *EDARADD* (Ensembl: ENSG00000186197; genomic location:  
499 chr1:236,348,257-236,502,915 (GRCh38.p13)) which also encodes altProt IP\_079312. Thus, as a  
500 result of this annotation, a pseudogene (*ENO1P1*) is nested within a protein-coding gene  
501 (*EDARADD*). Similarly, a second protein-coding gene termed *AL022312.1* (Ensembl:  
502 ENSG00000285025; genomic location: chr22: 39,504,231-39,504,443 (GRCh38.p13)) was added  
503 within the protein-coding *MIEF1* gene (Ensembl: ENSG00000100335; genomic location:  
504 chr22:39,499,432-39,518,132 (GRCh38.p13)) to annotate the recently discovered altORF  
505 upstream of the *MIEF1* CDS (Samandi *et al*, 2017; Vanderperre *et al*, 2013). We suggest that  
506 recognizing the polycistronic nature of some human genes to be able to annotate multiple  
507 protein-coding sequences in the same gene is more straightforward than annotating additional  
508 small genes nested in longer genes in order to comply with monocistronic annotations.  
509  
510 The involvement of 280 altProts in 347 of the 14029 protein-protein interactions in the current  
511 network (or 2.5 %) represents a sizable number of previously missing nodes and edges and

512 contributes to the understanding of network topology. The impact of altProt inclusion on  
513 network structure is revealed by the bridging role many seem to play between interconnected  
514 regions (Fig 3Ai-ix). This linkage of otherwise independent complexes introduces major changes  
515 to network structure shown to be related to biological system state (e.g. cell type) (Huttlin *et al*,  
516 2020). Results from the current analysis are thus anticipated to yield insight regarding molecular  
517 function and mechanisms of protein complexes in the contexts of cell type and other  
518 suborganismally defined states (Huttlin *et al*, 2020). Indeed, the presence of altProts in protein  
519 communities associated with known function and/or diseases makes it possible to generate  
520 testable hypotheses regarding their role in physiological and pathological mechanisms (Leblanc  
521 & Brunet, 2020).

522

523 An important observation stemming from the current study is that many pseudogenes encode  
524 one altProt in the network, including some encoding 2 altProts. Strikingly, several altProts  
525 expressed from pseudogenes interact with their respective parental protein. This suggests that  
526 pseudogene-encoded altProts are functional paralogs and that their incorporation into  
527 homomeric protein complexes of the parental protein could modulate or change the activity of  
528 the parental complex. Such function would be reminiscent of the role of homomers and  
529 heteromers of paralogs in the evolution of protein complexes in yeast, allowing structural and  
530 functional diversity (Marchant *et al*, 2019; Pereira-Leal *et al*, 2007). The GAPDH subnetwork with  
531 its 9 pseudogene-encoded altProts is particularly striking. Besides its canonical function in  
532 glycolysis, GAPDH displays a variety of different functions in different subcellular locations,  
533 including apoptosis, DNA repair, regulation of RNA stability, transcription, membrane fusion,  
534 and cytoskeleton dynamics (Colell *et al*, 2009; Sirover, 2012; Tristan *et al*, 2011). We propose  
535 that the incorporation of different paralog subunits in this multimeric complex results in the

536 assembly of different heteromeric complexes and may at least in part entail such functional and  
537 localization diversity. This hypothesis is in agreement with the speculation that the diversity of  
538 functions associated with GAPDH correlates with the remarkable number of GAPDH  
539 pseudogenes (Liu *et al*, 2009).

540

541 Among the 274 genes encoding the 280 altProts inserted in the network, 18 encode  
542 refProt/altProt pairs that specifically interact with each other, which implies that these pairs are  
543 involved in the same function. Such functional cooperation between a refProt and an altProt  
544 expressed from the same eukaryotic gene confirms previous observations in humans (Samandi  
545 *et al*, 2017; Chen *et al*, 2020; Bergeron *et al*, 2013; Klemke *et al*, 2001). Dual-coding genes are  
546 common in viruses (Chirico *et al*, 2010) and proteins expressed from viral overlapping ORFs  
547 often interact (Pavesi *et al*, 2018). The general tendency of physical or functional interaction  
548 between two proteins expressed from the same gene should help decipher the role of newly  
549 discovered proteins provided that functional characterization of the known protein is available.  
550 Molecular mechanisms behind the functional cooperation of such protein pairs remain to be  
551 explored.

552

553 Furthermore, several pairs of proteins encoded by the same gene but acting in distant parts of  
554 the network have also been identified. Could these altProts be a source of cross talk between  
555 functional modules under the same regulation at the genetic level, but multiplexed at the  
556 protein function level?

557

558 The current study shows that the 280 altProts incorporated in the network differ from refProts  
559 by their size (6 times smaller in average) but do not form a particular class of gene products;



560 rather they are members of common communities present throughout the proteomic  
561 landscape. Initial serendipitous detection of altProts subsequently called for proteogenomics  
562 approaches which widened discoveries via systematic and large-scale detection (Peeters &  
563 Menschaert, 2020; Brunet *et al*, 2020b). System resilience and biodiversity have long been  
564 linked in the ecology literature (Peterson *et al*, 1998); by analogy the increased proteomic  
565 diversity due to altProts could be a contributing factor to this effect in cellular systems. To find  
566 out the extent to which altProts play widespread and important biological functions will require  
567 more studies in functional genomics.

568

569

## 570 **Materials & Methods**

571

### 572 ***Reanalysis of AP-MS data***

573 Files obtained from the authors of the BioPlex 2.0 contained the results of 8,364 affinity  
574 purification-mass spectrometry (AP-MS) experiments using 3033 bait proteins (tagged with GFP)  
575 in 2 technical replicates or more barring missing replicates and corrupted files (Huttlin *et al*,  
576 2017, 2015). Files were converted from RAW to MGF format using Proteowizard 3.0 and  
577 searched with SearchGUI 2.9.0 using an ensemble of search engines (Comet, OMSSA, X!Tandem,  
578 and MS-GF+). Search parameters were set to a precursor ion tolerance of 4.5 ppm and fragment  
579 ion tolerance of 20 ppm, trypsin digestion with a maximum of 2 missed cleavages, and variable  
580 modifications included oxidation of methionine and acetylation of N termini. The minimum and  
581 maximum length for peptides were 8 and 30 amino acids respectively. Search results were  
582 aggregated using PeptideShaker 1.13.4 with a 0.001 % protein level false discovery rate (FDR) as  
583 described previously (Brunet *et al*, 2019). The protein library contained a non redundant list of  
584 all reference proteins from Uniprot (release 2019\_03\_01), Ensembl (GRCh38.95), and RefSeq  
585 (GRCh38.p12) (134477 proteins) in addition to all alternative protein (488956 proteins) and  
586 novel isoforms (68612 proteins) predictions from OpenProt 1.6. AltProt identifiers throughout  
587 the current article are accessions from OpenProt starting with “IP\_”. The library was  
588 concatenated with reversed sequences for the target decoy approach to spectrum matching.

589

### 590 ***Validation of altProt identifications***

591 Novel protein identifications were supported by unique peptides. An additional peptide centric  
592 approach was used to validate that spectra supporting such peptides could not be better  
593 explained by peptides from refProts with post-translational modifications. PepQuery allows the

594 search of specific peptides in spectra databases using an unrestricted modification search option  
595 (Wen *et al*, 2019). All possible peptide modifications from UniMod artifact and post translational  
596 modifications were considered when ensuring unicity of spectral matches (downloaded March  
597 2020) (Dm & Js, 2004).  
598 AltProt sequences with peptides validated with PepQuery have been submitted to the Uniprot  
599 Knowledge Base.

600

### 601 ***Obtaining spectral counts***

602 Because altProts are smaller than refProts they have a lower number of uniquely identifying  
603 peptides. For this reason altProts with at least one unique peptide across multiple replicates  
604 were considered, but only refProts identified with at least two unique peptides across multiple  
605 replicates were retained for downstream analysis. Spectra shared among refProts were counted  
606 in the total spectral count of each protein. Spectra assigned to altProts were counted only if  
607 unique to the protein or shared with another altProt. Spectra shared between an altProt and at  
608 least one refProt were given to the refProt. RefProt spectral counts were combined by gene  
609 following the methodology of the original study; however, it was necessary to keep altProts  
610 separate as many are encoded by genes that already contain a refProt or other altProts.

611

### 612 ***Interactions scoring***

613 Following protein identifications, high confidence interacting proteins (HCIPs) were identified  
614 following the method outlined in the original study (Huttlin *et al*, 2015). Briefly, the CompPASS R  
615 package was first used to compute statistical metrics (weighted D-score, Z score, and entropy) of  
616 prey identification based on peptide spectrum match (PSM) counts. The results from CompPASS  
617 were then used to build a vector of 9 features (as described in (Huttlin *et al*, 2015)) for each

618 candidate bait-prey pair which were passed to a Naive Bayes classifier (CompPASS Plus) tasked  
619 with the discrimination of HCIP from background identifications. The original study also included  
620 a class for wrong identification, but since decoy information was unavailable and because our  
621 approach employs a FDR three orders of magnitudes lower in the identification step, a third  
622 class was not deemed necessary. The classifier was trained in cross-validation fashion using 96  
623 well plate batches as splits and protein-protein interactions from the original study as target  
624 labels for true interactors.

625 Threshold selection was implemented considering the Jaccard overlap (equation i), recall  
626 (equation ii), precision and F1 score (equation iv) metrics between networks resulting from the  
627 re-analysis and the original study. The main differences between the OpenProt derived re-  
628 analysis and BioPlex 2.0 lie in the total spectral counts resulting from the use of different search  
629 algorithms and more stringent FDR. It was thus important to tune model threshold selection to  
630 maximally reproduce results from the original study (Figure EV1B). A threshold of 0.045 was  
631 selected as it compromised well between optimal Jaccard overlap, F score, and precision (Fig  
632 EV1A).

633

$$634 \quad J(A, B) = \frac{|A \cap B|}{|A \cup B|} \quad (\text{i})$$

$$635 \quad \textit{precision} = \frac{|A \cap B|}{|A|} \quad (\text{ii})$$

$$636 \quad \textit{recall} = \frac{|A \cap B|}{|B|} \quad (\text{iii})$$

$$637 \quad F = 2 \cdot \frac{\textit{precision} \cdot \textit{recall}}{\textit{precision} + \textit{recall}} \quad (\text{iv})$$

638 *A: set of OpenProt derived protein-protein interactions*

639 *B: set of BioPlex 2.0 protein-protein interactions*

640

641 ***Network assembly and structural analysis***

642 Bait-prey pairs classified as HCIP were combined into an undirected network using genes to  
643 represent refProt nodes and OpenProt protein accessions to represent altProt nodes. The  
644 Networkx 2.5 Python package was used for network assembly and all network metrics  
645 calculations.  
646 The power law fit to the degree distribution was computed with the discreet maximum  
647 likelihood estimator described by (Clauset *et al*, 2009).  
648 A list of known protein complexes from CORUM 3.0 (Giurgiu *et al*, 2019) (core complexes,  
649 downloaded March 2020) was mapped onto the resulting network to assess the validity of  
650 identified interactions (Table EV3). Only complexes in which at least two subunits corresponded  
651 to baits present in the network were selected for downstream analyses. The portion of subunits  
652 identified in the direct neighbourhood of baits was computed for each complex.

653

#### 654 ***Patterns of interactions involving altProt and refProts***

655 We aimed to assess the relationship between pseudogene-derived altProts and their  
656 corresponding refProts from parental genes, in terms of their sequence similarity and their  
657 degrees of separation in the network. Parent genes of pseudogenes were selected via the  
658 psiCUBE resource (Sisu *et al*, 2014) combined with manual curation using Ensembl. Needleman  
659 Wunch global alignment algorithm (with BLOSUM62 matrix) as implemented by the sciki-bio  
660 Python package (version 0.5.5) was used as a similarity measure between protein sequences.  
661 To assess degrees of separation, shortest path lengths were computed both for altProt-refProt  
662 pairs of pseudogene-parental gene and altProt-refProt pairs encoded by the same gene. For the  
663 former, when the refProt was not present in the network, or when no path could be computed  
664 between nodes, the shortest path length was computed using a mapping of either the BioPlex  
665 2.0 or BIOGRID networks (Stark *et al*, 2006).

666

667 ***Community detection via clustering***

668 A Python implementation of the markov clustering (MCL) algorithm

669 ([https://github.com/GuyAllard/markov\\_clustering](https://github.com/GuyAllard/markov_clustering)) was used to partition the network into

670 clusters of proteins (Enright *et al*, 2002). Various values of the inflation parameter between 1.5

671 and 2.5 were attempted and, similarly to the original study, a value of 2.0 was selected as it

672 compared favorably with known protein complexes. Only clusters of 3 proteins or higher were

673 retained yielding a total of 1045 clusters. Connections between clusters were determined by

674 calculating enrichment of links between proteins in pairs of clusters using a hypergeometric test

675 with alpha value set to  $<0.05$  and a Benjamini-Hochberg corrected FDR of 1 %. A total of 266

676 pairs of clusters were found to be significantly connected.

677

678 ***Disease association***

679 A list of 32,375 disease-gene associations curated by DisGeNET (downloaded March 2020) was

680 mapped onto the network of 1045 protein communities. A disease was associated with a cluster

681 when it was deemed enriched in genes associated with the disease as calculated by

682 hypergeometric testing, with alpha value set to  $<0.01$  Benjamini-Hochberg corrected FDR of 1 %.

683

684 ***Gene Ontology Enrichment***

685 Gene Ontology term enrichments for both altProt second neighborhoods and protein clusters

686 were computed using the GOAtools Python package (version 1.0.2). Count propagation to

687 parental terms was set to true, alpha value to 0.05, with a Benjamini-Hochberg corrected FDR of

688 1 %.

689

690 ***Cloning and antibodies***

691 All nucleotide sequences were generated by the Bio Basic Gene Synthesis service, except for  
692 pcDNA3-FLAG-FADD, a kind gift from Jaewhan Song (Addgene plasmid # 78802 ;  
693 <http://n2t.net/addgene:78802> ; RRID:Addgene\_78802). IP\_117582, IP\_624363, and IP\_762813  
694 were all tagged with 2 FLAG (DYKDDDDKDYKDDDDK) at their C-terminal. IP\_198808 was tagged  
695 with eGFP at its C-terminal. All altProt coding sequences were subcloned into a pcDNA3.1-  
696 plasmid. The coding sequences of RPL18, eEF1A1 and PHB were derived from their canonical  
697 transcript (NM\_000979.3, NM\_001402.6, NM\_001281496.1 respectively). RPL18 and PHB were  
698 tagged with eGFP at their C-terminal and eEF1A1 was tagged with eGFP at its N-terminal. All  
699 refProt coding sequences were subcloned into a pcDNA3.1- plasmid.

700

701 ***Cell culture, transfections and immunofluorescence***

702 HEK293 and HeLa cultured cells were routinely tested negative for mycoplasma contamination  
703 (ATCC 30–1012K). Transfections, immunofluorescence, confocal analyses were carried out as  
704 previously described (Brunet *et al*, 2020a). Briefly, transfection was carried with jetPRIME®, DNA  
705 and siRNA transfection reagents (VWR) according to the manufacturer's protocol. To note, only  
706 0.1 µg of pEGFP DNA versus 3 µg IP\_198808-GFP was used for transfection in 100 mm petri  
707 dishes to compensate for its higher transfection and expression efficiency. Cells were fixed in 4  
708 % paraformaldehyde for 20 mins at 4°C, solubilized in 1 % Triton for 5 mins and incubated in  
709 blocking solution (10 % NGS in PBS) for 20 mins. The primary antibodies were diluted in the  
710 blocking solution as follows: anti-Flag (Sigma, F1804) 1/1000. The secondary antibodies were  
711 diluted in the blocking solution as follows: anti-mouse Alexa 647 (Cell signaling 4410S) 1/1000.  
712 All images were taken on a Leica TCS SP8 STED 3X confocal microscope.

713

714 ***Affinity Purification and western blots***

715 Immunoprecipitation experiments via GFP-Trap (ChromoTek, Germany) were carried out as  
716 previously described (Samandi *et al*, 2017), while experiments via Anti-FLAG® M2 Magnetic  
717 Beads (M8823, Sigma) were conducted according to the manufacturer's protocol with minor  
718 modifications. Briefly, HEK293 cells were lysed in the lysis buffer (150 mM NaCl, 50 mM Tris pH  
719 7.5, 1 % Triton, 1 x EDTA-free Roche protease inhibitors) and incubated on ice for 30 mins prior  
720 to a double sonication at 12 % for 3 seconds each (1 min on ice between sonications). The cell  
721 lysates were centrifuged, the supernatant was isolated and the protein content was assessed  
722 using BCA assay (Pierce). Anti-FLAG beads were conditioned with the lysis buffer. 20 µL of beads  
723 were added to 1 mg of proteins at a final concentration of 1 mg/mL and incubated overnight at  
724 4°C. Then, the beads were washed 5 times with the lysis buffer (twice with 800 µL and twice  
725 with 500µL) prior to elution in 45 µL of Laemmli buffer and boiled at 95°C for 5 min. For co-  
726 immunoprecipitation of PHB1-GFP and RPL18-GFP, stringent wash were done with modified  
727 lysis buffer (250 mM NaCl + 20 µg/ml peptide FLAG (F3290 Sigma)) prior to elution with  
728 200µg/ml peptide FLAG. Eluates were loaded onto 10 % SDS-PAGE gels for western blotting of  
729 GFP and FLAG tagged proteins. 40 µg of input lysates were loaded into gels as inputs. Western  
730 blots were carried out as previously described (Brunet *et al*, 2020a). The primary antibodies  
731 were diluted as follows: anti-Flag (Sigma, F7425) 1/1000 and anti-GFP (Santa Cruz, sc-9996)  
732 1/8000. The secondary antibodies were diluted as follows: anti-mouse HRP (Santa Cruz sc-  
733 516102) 1/10000 and anti-rabbit HRP (Cell signaling 7074S) 1/10000.

734

735 ***Affinity Purification Mass Spectrometry (AP-MS)***

736 For interactome analysis by mass spectrometry, HEK293 cells at a 70 % confluence were  
737 transfected with GFP-tagged PHB or with FLAG-tagged PHBP19 (IP\_762813). 24h after



738 transfection, cells were rinsed twice with PBS, and lysed in the AP lysis buffer (150 mM NaCl, 50  
739 mM Tris-HCl and 1 % Triton). Protein concentration was evaluated with a BCA dosage and 1 mg  
740 of total protein was incubated at 4 °C for 4 hours with agarose GFP beads (ChromoTek,  
741 Germany) for PHB-GFP or with magnetic FLAG beads (Sigma, M8823) for IP\_762813-FLAG. The  
742 beads were pre-conditioned with the AP lysis buffer. The beads were then washed twice with 1  
743 mL of AP lysis buffer, and 5 times with 5 mL of 20 mM NH<sub>4</sub>HCO<sub>3</sub> (ABC). Proteins were eluted  
744 and reduced from the beads using 10 mM DTT (15 mins at 55 °C), and then treated with 20 mM  
745 IAA (1 hour at room temperature in the dark). Proteins were digested overnight by adding 1 µg  
746 of trypsin (Promega, Madison, Wisconsin) in 100 µL ABC at 37 °C overnight. Digestion was  
747 quenched using 1 % formic acid and the supernatant was collected. Beads were washed once  
748 with acetonitrile/water/formic acid (1/1/0.01 v/v) and pooled with supernatant. Peptides were  
749 dried with a speedvac, desalted using a C18 Zip-Tip (Millipore Sigma, Etobicoke, Ontario,  
750 Canada) and resuspended into 30 µl of 1 % formic acid in water prior to mass spectrometry  
751 analysis.

752

### 753 ***Mass spectrometry analysis of in-house affinity purifications***

754 Peptides were separated in a PepMap C18 nano column (75 µm × 50 cm, Thermo Fisher  
755 Scientific). The setup used a 0–35 % gradient (0–215 min) of 90 % acetonitrile, 0.1 % formic acid  
756 at a flow rate of 200 nL/min followed by acetonitrile wash and column re-equilibration for a  
757 total gradient duration of 4 h with a RSLC Ultimate 3000 (Thermo Fisher Scientific, Dionex).  
758 Peptides were sprayed using an EASYSpray source (Thermo Fisher Scientific) at 2 kV coupled to a  
759 quadrupole-Orbitrap (QExactive, Thermo Fisher Scientific) mass spectrometer. Full-MS spectra  
760 within a m/z 350–1600 mass range at 70,000 resolution were acquired with an automatic gain  
761 control (AGC) target of 1e6 and a maximum accumulation time (maximum IT) of 20 ms.

762 Fragmentation (MS/MS) of the top ten ions detected in the Full-MS scan at 17,500 resolution,  
763 AGC target of 5e5, a maximum IT of 60 ms with a fixed first mass of 50 within a 3 m/z isolation  
764 window at a normalized collision energy (NCE) of 25. Dynamic exclusion was set to 40 s. Mass  
765 spectrometry RAW files were searched with the Andromeda search engine implemented in  
766 MaxQuant 1.6.9.0. The digestion mode was set at Trypsin/P with a maximum of two missed  
767 cleavages per peptides. Oxidation of methionine and acetylation of N-terminal were set as  
768 variable modifications, and carbamidomethylation of cysteine was set as fixed modification.  
769 Precursor and fragment tolerances were set at 4.5 and 20 ppm respectively. Files were searched  
770 using a target-decoy approach against UniprotKB (Homo sapiens, SwissProt, 2020-10 release)  
771 with the addition of IP\_762813 sequence for a total of 20360 entries. The false discovery rate  
772 (FDR) was set at 1 % for peptide-spectrum-match, peptide and protein levels. Only proteins  
773 identified with at least two unique peptides were kept for downstream analyses.

774

#### 775 ***Highly confident interacting proteins (HCIPs) scoring of in-house affinity purifications***

776 Protein interactions were scored using the SAINT algorithm. For each AP-MS, experimental  
777 controls were used: GFP alone transfected cells for PHB-GFP AP and mock transfected cells for  
778 IP\_762813-2F AP. For the PHB-GFP AP, controls from the Crapome repository (Mellacheruvu *et*  
779 *al*, 2013) corresponding to transient GFP-tag expression in HEK293 cells, pulled using camel  
780 agarose beads were used. These controls are: CC42, CC44, CC45, CC46, CC47, and CC48. For the  
781 IP\_762813-FLAG AP, controls from the Crapome repository (Choi *et al*, 2011) corresponding to  
782 transient FLAG-tag expression in HEK293 cells, pulled using M2-magnetic beads were used.  
783 These controls are: CC55, CC56, CC57, CC58, CC59, CC60 and CC61. The fold-change over the  
784 experimental controls (FC\_A), over the Crapome controls (FC\_B) and the SAINT probability  
785 scores were calculated as follows. The FC\_A was evaluated using the geometric mean of

786 replicates and a stringent background estimation. The FC\_B was evaluated using the geometric  
787 mean of replicates and a stringent background estimation. The SAINT score was calculated using  
788 SAINTexpress, using experimental controls and default parameters. Proteins with a SAINT score  
789 above 0.8, a FC\_A and a FC\_B above 1,5 were considered HCIPs.

790

791 ***Network visualisation of in-house affinity purifications***

792 The network was built using Python scripts (version 3.7.3) and the Networkx package (version  
793 2.4). The interactions from the STRING database were retrieved from their protein links  
794 downloadable file. Only interactions with a combined score above 750 were kept.

795

796

## 797 **Data Availability**

798 The datasets and computer code produced in this study are available in the following databases:

- 799       • Protein interaction AP-MS data for both IP\_762813 and PHB1 in HEK293 cells were  
800       deposited to the ProteomeXchange Consortium via the PRIDE (Perez-Riverol *et al*, 2016)  
801       partner repository with the dataset identifier PXD022491.
- 802       • Jupyter notebooks containing the analyses are available in the GitHub repository  
803       created for this project ([https://github.com/Seb-Leb/altProts\\_in\\_communities](https://github.com/Seb-Leb/altProts_in_communities)).

804

805

## 806 **Acknowledgements**

807 We thank the Gygi lab for providing mass spectrometry (MS) datasets and particularly Ed Huttlin  
808 for helpful email exchanges. XR, MSS and AAC are members of the Fonds de Recherche du  
809 Québec Santé (FRQS)-supported Centre de Recherche du Centre Hospitalier Universitaire de  
810 Sherbrooke. This research was supported by CIHR grants MOP-137056 and MOP-136962, and by  
811 a Canada Research Chair in Functional Proteomics and Discovery of Novel Proteins to X.R. We  
812 thank the team at Calcul Québec and Compute Canada for their support with the use of the  
813 supercomputer mp2 from Université de Sherbrooke. We thank Darel Hunting for critically  
814 reviewing the manuscript.

815

816

817

818 **Author contributions**

819 Conceptualization: XR, SL and MAB. Experiments in Fig 1-5, EV1, EV2, data visualization, all

820 Tables: SL. Naive Bayes classifier and interaction scoring: AAC, MSS, SL. Experiments in Fig 6:

821 AML, AD, AT, ABG, MAB and JFJ. Experiments in Fig EV3: MAB and JFJ. Writing\_original draft: XR

822 and SL. Writing\_review&editing: AAC, JFJ, MAB, MSS, SL, SS. Resources, funding acquisition,

823 project administration: XR. SS and MB initiated the project and mentored SL.

824

825

826 **Conflict of interest**

827 Authors report no conflict of interest.

828

829

## 830 **References**

831

832 Bergeron D, Lapointe C, Bissonnette C, Tremblay G, Motard J & Roucou X (2013) An out-of-  
833 frame overlapping reading frame in the ataxin-1 coding sequence encodes a novel  
834 ataxin-1 interacting protein. *J Biol Chem* 288: 21824–21835

835 Bianconi G & Barabási A-L (2001) Bose-Einstein Condensation in Complex Networks. *Phys Rev*  
836 *Lett* 86: 5632–5635

837 Brunet MA, Brunelle M, Lucier J-F, Delcourt V, Levesque M, Grenier F, Samandi S, Leblanc S,  
838 Aguilar J-D, Dufour P, *et al* (2019) OpenProt: a more comprehensive guide to explore  
839 eukaryotic coding potential and proteomes. *Nucleic Acids Res* 47: D403–D410

840 Brunet MA, Jacques J-F, Nassari S, Tyzack GE, McGoldrick P, Zinman L, Jean S, Robertson J,  
841 Patani R & Roucou X (2020a) FUS gene is dual-coding with both proteins united in FUS-  
842 mediated toxicity. *bioRxiv*: 848580

843 Brunet MA, Leblanc S & Roucou X (2020b) Reconsidering proteomic diversity with functional  
844 investigation of small ORFs and alternative ORFs. *Exp Cell Res* 393: 112057

845 Brunet MA, Levesque SA, Hunting DJ, Cohen AA & Roucou X (2018) Recognition of the  
846 polycistronic nature of human genes is critical to understanding the genotype-  
847 phenotype relationship. *Genome Res*

848 Brunet MA, Lucier J-F, Levesque M, Leblanc S, Jacques J-F, Al-Saedi HRH, Guilloy N, Grenier F,  
849 Avino M, Fournier I, *et al* (2020c) OpenProt 2021: deeper functional annotation of the  
850 coding potential of eukaryotic genomes. *Nucleic Acids Res*

851 Caspary F & Séraphin B (1998) The yeast U2A'/U2B complex is required for pre-spliceosome  
852 formation. *EMBO J* 17: 6348–6358

853 Chen J, Brunner A-D, Cogan JZ, Nuñez JK, Fields AP, Adamson B, Itzhak DN, Li JY, Mann M,



- 854 Leonetti MD, *et al* (2020) Pervasive functional translation of noncanonical human open  
855 reading frames. *Science* 367: 1140–1146
- 856 Chirico N, Vianelli A & Belshaw R (2010) Why genes overlap in viruses. *Proc Biol Sci* 277: 3809–  
857 3817
- 858 Choong W-K, Lih T-SM, Chen Y-J & Sung T-Y (2017) Decoding the Effect of Isobaric Substitutions  
859 on Identifying Missing Proteins and Variant Peptides in Human Proteome. *J Proteome*  
860 *Res* 16: 4415–4424
- 861 Clauset A, Shalizi CR & Newman MEJ (2009) Power-law distributions in empirical data. *SIAM Rev*  
862 51: 661–703
- 863 Close P, Gillard M, Ladang A, Jiang Z, Papuga J, Hawkes N, Nguyen L, Chapelle J-P, Bouillenne F,  
864 Svejstrup J, *et al* (2012) DERP6 (ELP5) and C3ORF75 (ELP6) Regulate Tumorigenicity and  
865 Migration of Melanoma Cells as Subunits of Elongator. *J Biol Chem* 287: 32535–32545
- 866 Colell A, Green DR & Ricci J-E (2009) Novel roles for GAPDH in cell death and carcinogenesis. *Cell*  
867 *Death Differ* 16: 1573–1581
- 868 Delcourt V, Franck J, Leblanc E, Narducci F, Robin Y-M, Gimeno J-P, Quanico J, Wisztorski M,  
869 Kobeissy F, Jacques J-F, *et al* (2017) Combined Mass Spectrometry Imaging and Top-  
870 down Microproteomics Reveals Evidence of a Hidden Proteome in Ovarian Cancer.  
871 *EBioMedicine* 21: 55–64
- 872 Delcourt V, Staskevicius A, Salzet M, Fournier I & Roucou X (2018) Small Proteins Encoded by  
873 Unannotated ORFs are Rising Stars of the Proteome, Confirming Shortcomings in  
874 Genome Annotations and Current Vision of an mRNA. *Proteomics* 18: e1700058
- 875 Deutsch EW, Lane L, Overall CM, Bandeira N, Baker MS, Pineau C, Moritz RL, Corrales F, Orchard  
876 S, Van Eyk JE, *et al* (2019) Human Proteome Project Mass Spectrometry Data  
877 Interpretation Guidelines 3.0. *J Proteome Res* 18: 4108–4116

- 878 Di Benedetto G, Zoccarato A, Lissandron V, Terrin A, Li X, Houslay MD, Baillie GS & Zaccolo M  
879 (2008) Protein kinase A type I and type II define distinct intracellular signaling  
880 compartments. *Circ Res* 103: 836–844
- 881 Dinger ME, Pang KC, Mercer TR & Mattick JS (2008) Differentiating protein-coding and  
882 noncoding RNA: challenges and ambiguities. *PLoS Comput Biol* 4: e1000176
- 883 Dm C & Js C (2004) Unimod: Protein modifications for mass spectrometry. *Proteomics* 4
- 884 Drazyk AM, Tan RYY, Tay J, Traylor M, Das T & Markus HS (2019) Encephalopathy in a Large  
885 Cohort of British Cerebral Autosomal Dominant Arteriopathy With Subcortical Infarcts  
886 and Leukoencephalopathy Patients. *Stroke* 50: 283–290
- 887 Dubois M-L, Meller A, Samandi S, Brunelle M, Frion J, Brunet MA, Toupin A, Beaudoin MC,  
888 Jacques J-F, Lévesque D, *et al* (2020) UBB pseudogene 4 encodes functional ubiquitin  
889 variants. *Nat Commun* 11: 1306
- 890 Ekman D, Light S, Björklund AK & Elofsson A (2006) What properties characterize the hub  
891 proteins of the protein-protein interaction network of *Saccharomyces cerevisiae*?  
892 *Genome Biol* 7: R45
- 893 Enright AJ, Van Dongen S & Ouzounis CA (2002) An efficient algorithm for large-scale detection  
894 of protein families. *Nucleic Acids Res* 30: 1575–1584
- 895 Eyckerman S, Titeca K, Van Quickelberghe E, Cloots E, Verhee A, Samyn N, De Ceuninck L,  
896 Timmerman E, De Sutter D, Lievens S, *et al* (2016) Trapping mammalian protein  
897 complexes in viral particles. *Nat Commun* 7: 11416
- 898 Giurgiu M, Reinhard J, Brauner B, Dunger-Kaltenbach I, Fobo G, Frishman G, Montrone C &  
899 Ruepp A (2019) CORUM: the comprehensive resource of mammalian protein  
900 complexes-2019. *Nucleic Acids Res* 47: D559–D563
- 901 Huttlin EL, Bruckner RJ, Navarrete-Perea J, Cannon JR, Baltier K, Gebreab F, Gygi MP, Thornock

902 A, Zarraga G, Tam S, *et al* (2020) Dual Proteome-scale Networks Reveal Cell-specific  
903 Remodeling of the Human Interactome. *bioRxiv*: 2020.01.19.905109

904 Huttlin EL, Bruckner RJ, Paulo JA, Cannon JR, Ting L, Baltier K, Colby G, Gebreab F, Gygi MP,  
905 Parzen H, *et al* (2017) Architecture of the human interactome defines protein  
906 communities and disease networks. *Nature* 545: 505–509

907 Huttlin EL, Ting L, Bruckner RJ, Gebreab F, Gygi MP, Szpyt J, Tam S, Zarraga G, Colby G, Baltier K,  
908 *et al* (2015) The BioPlex Network: A Systematic Exploration of the Human Interactome.  
909 *Cell* 162: 425

910 Ingolia NT, Hussmann JA & Weissman JS (2019) Ribosome Profiling: Global Views of Translation.  
911 *Cold Spring Harb Perspect Biol* 11

912 Jeong H, Mason SP, Barabási A-L & Oltvai ZN (2001) Lethality and centrality in protein networks.  
913 *Nature* 411: 41

914 Keskin O, Tuncbag N & Gursoy A (2016) Predicting Protein-Protein Interactions from the  
915 Molecular to the Proteome Level. *Chem Rev* 116: 4884–4909

916 Kim H-K, Bhattarai KR, Junjappa RP, Ahn JH, Pagire SH, Yoo HJ, Han J, Lee D, Kim K-W, Kim H-R, *et*  
917 *al* (2020) TMBIM6/BI-1 contributes to cancer progression through assembly with  
918 mTORC2 and AKT activation. *Nat Commun* 11: 4012

919 Klemke M, Kehlenbach RH & Huttner WB (2001) Two overlapping reading frames in a single  
920 exon encode interacting proteins—a novel way of gene usage. *EMBO J* 20: 3849–3860

921 Kovács IA, Luck K, Spirohn K, Wang Y, Pollis C, Schlabach S, Bian W, Kim D-K, Kishore N, Hao T, *et*  
922 *al* (2019) Network-based prediction of protein interactions. *Nat Commun* 10: 1240

923 Leblanc S & Brunet MA (2020) Modelling of pathogen-host systems using deeper ORF  
924 annotations and transcriptomics to inform proteomics analyses. *Comput Struct*  
925 *Biotechnol J* 18: 2836–2850

- 926 Liu X, Salokas K, Tamene F, Jiu Y, Weldatsadik RG, Öhman T & Varjosalo M (2018) An AP-MS- and  
927 BioID-compatible MAC-tag enables comprehensive mapping of protein interactions and  
928 subcellular localizations. *Nat Commun* 9: 1188
- 929 Liu Y-J, Zheng D, Balasubramanian S, Carriero N, Khurana E, Robilotto R & Gerstein MB (2009)  
930 Comprehensive analysis of the pseudogenes of glycolytic enzymes in vertebrates: the  
931 anomalously high number of GAPDH pseudogenes highlights a recent burst of  
932 retrotrans-positional activity. *BMC Genomics* 10: 480
- 933 Luck K, Sheynkman GM, Zhang I & Vidal M (2017) Proteome-Scale Human Interactomics. *Trends*  
934 *Biochem Sci* 42: 342–354
- 935 Ma J, Ward CC, Jungreis I, Slavoff SA, Schwaid AG, Neveu J, Budnik BA, Kellis M & Saghatelian A  
936 (2014) Discovery of human sORF-encoded polypeptides (SEPs) in cell lines and tissue. *J*  
937 *Proteome Res* 13: 1757–1765
- 938 Mahesh PA (2013) Unravelling the role of ADAM 33 in asthma. *Indian J Med Res* 137: 447–450
- 939 Marchant A, Cisneros AF, Dubé AK, Gagnon-Arsenault I, Ascencio D, Jain H, Aubé S, Eberlein C,  
940 Evans-Yamamoto D, Yachie N, *et al* (2019) The role of structural pleiotropy and  
941 regulatory evolution in the retention of heteromers of paralogs. *eLife* 8
- 942 Mellacheruvu D, Wright Z, Couzens AL, Lambert J-P, St-Denis NA, Li T, Miteva YV, Hauri S, Sardi  
943 ME, Low TY, *et al* (2013) The CRAPome: a contaminant repository for affinity  
944 purification-mass spectrometry data. *Nat Methods* 10: 730–736
- 945 Mitchell AL, Attwood TK, Babbitt PC, Blum M, Bork P, Bridge A, Brown SD, Chang H-Y, El-Gebali  
946 S, Fraser MI, *et al* (2019) InterPro in 2019: improving coverage, classification and access  
947 to protein sequence annotations. *Nucleic Acids Res* 47: D351–D360
- 948 Murphy G (2008) The ADAMs: signalling scissors in the tumour microenvironment. *Nat Rev*  
949 *Cancer* 8: 929–941

- 950 Nesvizhskii AI (2014) Proteogenomics: concepts, applications and computational strategies. *Nat*  
951 *Methods* 11: 1114–1125
- 952 Orr MW, Mao Y, Storz G & Qian S-B (2020) Alternative ORFs and small ORFs: shedding light on  
953 the dark proteome. *Nucleic Acids Res* 48: 1029–1042
- 954 Osman C, Merkwirth C & Langer T (2009) Prohibitins and the functional compartmentalization of  
955 mitochondrial membranes. *J Cell Sci* 122: 3823–3830
- 956 Pavesi A, Vianelli A, Chirico N, Bao Y, Blinkova O, Belshaw R, Firth A & Karlin D (2018)  
957 Overlapping genes and the proteins they encode differ significantly in their sequence  
958 composition from non-overlapping genes. *PLOS ONE* 13: e0202513
- 959 Peeters MKR & Menschaert G (2020) The hunt for sORFs: A multidisciplinary strategy. *Exp Cell*  
960 *Res* 391: 111923
- 961 Pereira-Leal JB, Levy ED, Kamp C & Teichmann SA (2007) Evolution of protein complexes by  
962 duplication of homomeric interactions. *Genome Biol* 8: R51
- 963 Perez-Riverol Y, Xu Q-W, Wang R, Uszkoreit J, Griss J, Sanchez A, Reisinger F, Csordas A, Ternent  
964 T, Del-Toro N, *et al* (2016) PRIDE Inspector Toolsuite: Moving Toward a Universal  
965 Visualization Tool for Proteomics Data Standard Formats and Quality Assessment of  
966 ProteomeXchange Datasets. *Mol Cell Proteomics MCP* 15: 305–317
- 967 Peterson G, Allen CR & Holling CS (1998) Ecological Resilience, Biodiversity, and Scale.  
968 *Ecosystems* 1: 6–18
- 969 Piñero J, Ramírez-Anguita JM, Saüch-Pitarch J, Ronzano F, Centeno E, Sanz F & Furlong LI (2020)  
970 The DisGeNET knowledge platform for disease genomics: 2019 update. *Nucleic Acids Res*  
971 48: D845–D855
- 972 Reiss K & Saftig P (2009) The ‘a disintegrin and metalloprotease’ (ADAM) family of sheddases:  
973 physiological and cellular functions. *Semin Cell Dev Biol* 20: 126–137

- 974 Rolland T, Taşan M, Charlotheaux B, Pevzner SJ, Zhong Q, Sahni N, Yi S, Lemmens I, Fontanillo C,  
975 Mosca R, *et al* (2014) A proteome-scale map of the human interactome network. *Cell*  
976 159: 1212–1226
- 977 Ruggles KV, Krug K, Wang X, Clauser KR, Wang J, Payne SH, Fenyö D, Zhang B & Mani DR (2017)  
978 Methods, Tools and Current Perspectives in Proteogenomics. *Mol Cell Proteomics MCP*  
979 16: 959–981
- 980 Samandi S, Roy AV, Delcourt V, Lucier J-F, Gagnon J, Beaudoin MC, Vanderperre B, Breton M-A,  
981 Motard J, Jacques J-F, *et al* (2017) Deep transcriptome annotation enables the discovery  
982 and functional characterization of cryptic small proteins. *eLife* 6
- 983 Short K, Wiradjaja F & Smyth I (2007) Let’s stick together: the role of the Fras1 and Frem  
984 proteins in epidermal adhesion. *IUBMB Life* 59: 427–435
- 985 Siegel RM, Martin DA, Zheng L, Ng SY, Bertin J, Cohen J & Lenardo MJ (1998) Death-effector  
986 Filaments: Novel Cytoplasmic Structures that Recruit Caspases and Trigger Apoptosis. *J*  
987 *Cell Biol* 141: 1243–1253
- 988 Sirover MA (2012) Subcellular dynamics of multifunctional protein regulation: mechanisms of  
989 GAPDH intracellular translocation. *J Cell Biochem* 113: 2193–2200
- 990 Sisu C, Pei B, Leng J, Frankish A, Zhang Y, Balasubramanian S, Harte R, Wang D, Rutenberg-  
991 Schoenberg M, Clark W, *et al* (2014) Comparative analysis of pseudogenes across three  
992 phyla. *Proc Natl Acad Sci* 111: 13361–13366
- 993 Slavoff SA, Mitchell AJ, Schwaid AG, Cabili MN, Ma J, Levin JZ, Karger AD, Budnik BA, Rinn JL &  
994 Saghatelian A (2013) Peptidomic discovery of short open reading frame-encoded  
995 peptides in human cells. *Nat Chem Biol* 9: 59–64
- 996 Smith TM, Tharakan A & Martin RK (2020) Targeting ADAM10 in Cancer and Autoimmunity.  
997 *Front Immunol* 11: 499

- 998 Sowa ME, Bennett EJ, Gygi SP & Harper JW (2009) Defining the human deubiquitinating enzyme  
999 interaction landscape. *Cell* 138: 389–403
- 1000 Stark C, Breitkreutz B-J, Reguly T, Boucher L, Breitkreutz A & Tyers M (2006) BioGRID: a general  
1001 repository for interaction datasets. *Nucleic Acids Res* 34: D535-539
- 1002 Ting YS, Egertson JD, Payne SH, Kim S, MacLean B, Käll L, Aebersold R, Smith RD, Noble WS &  
1003 MacCoss MJ (2015) Peptide-Centric Proteome Analysis: An Alternative Strategy for the  
1004 Analysis of Tandem Mass Spectrometry Data. *Mol Cell Proteomics MCP* 14: 2301–2307
- 1005 Tristan C, Shahani N, Sedlak TW & Sawa A (2011) The diverse functions of GAPDH: views from  
1006 different subcellular compartments. *Cell Signal* 23: 317–323
- 1007 Vanderperre B, Lucier J-F, Bissonnette C, Motard J, Tremblay G, Vanderperre S, Wisztorski M,  
1008 Salzet M, Boisvert F-M & Roucou X (2013) Direct detection of alternative open reading  
1009 frames translation products in human significantly expands the proteome. *PloS One* 8:  
1010 e70698
- 1011 Wagner A & Fell DA (2001) The small world inside large metabolic networks. *Proc R Soc Lond B*  
1012 *Biol Sci* 268: 1803–1810
- 1013 Wan C, Borgeson B, Phanse S, Tu F, Drew K, Clark G, Xiong X, Kagan O, Kwan J, Bezginov A, *et al*  
1014 (2015) Panorama of ancient metazoan macromolecular complexes. *Nature* 525: 339–  
1015 344
- 1016 Wen B, Wang X & Zhang B (2019) PepQuery enables fast, accurate, and convenient proteomic  
1017 validation of novel genomic alterations. *Genome Res* 29: 485–493
- 1018 Wolfson RL, Chantranupong L, Wyant GA, Gu X, Orozco JM, Shen K, Condon KJ, Petri S, Kedir J,  
1019 Scaria SM, *et al* (2017) KICSTOR recruits GATOR1 to the lysosome and is necessary for  
1020 nutrients to regulate mTORC1. *Nature* 543: 438–442
- 1021

1022 **Figure legends**

1023

1024 **Figure 1 - Analysis overview and identification of alternative proteins in the human**

1025 ***interactome.***

1026 **A-B** The classical model of RNA transcript coding sequence annotation includes only one  
1027 reference open reading frame (ORF) on mRNAs encoding a reference protein (refProt) and no  
1028 functional ORF within ncRNAs (A), while the alternative translation model considers multiple  
1029 proteins encoded in different reading frames in the same transcript including refProts and  
1030 alternative proteins (altProt)(B).

1031 **C** Our re-analysis pipeline of high throughput AP-MS experiments from BioPlex 2.0 employs  
1032 stringent criteria to ensure confident identification of both protein detection and interaction  
1033 detection. Of the 434 altProts initially identified in the dataset, 280 joined the network of  
1034 protein interactions after filtration.

1035 **D** AltProts are in general shorter than reference proteins. Boxes represent the inter quartile  
1036 range (IQR) marked at the median and the whiskers are set at 1.5\*IQR over and under the 25th  
1037 and 75th percentiles.

1038 **E** Identified altProts (295) were encoded by transcripts (455) of a variety of biotypes. 121 of  
1039 identified altProts are encoded by transcripts of protein coding biotype, 136 by transcripts of  
1040 pseudogenes, and 38 exclusively by transcripts of non-coding biotype (ncRNA).

1041 **F** AltORFs found encoded by transcripts from genes of protein coding biotype are most often  
1042 overlapping the canonical CDS or localized downstream in the 3'UTR. A significant fraction of  
1043 altORFs also localize in ncRNAs of protein coding genes. CDS: coding region, UTR: untranslated  
1044 region (non-coding).

1045 **G** Orthology data across 10 species from OpenProt 1.6 for detected altProts.



1046

1047 **Figure 2 - Interaction mapping and network features of protein-protein interactions.**

1048 **A** The largest component of the network assembled from the OpenProt based re-analysis of high  
1049 throughput affinity purification mass spectrometry data from BioPlex 2.0.

1050 **B** A venn diagram of bait-prey interactions identified with the OpenProt derived re-analysis,  
1051 BioPlex 2.0, and BioPlex 3.0 shows a significant overlap despite the smaller overall size of the re-  
1052 analysis results (due to stringent filtration). It should also be noted that alternative proteins  
1053 were not present in the BioPlex 2.0 analytical pipeline which accounts for part of the gap in  
1054 overlap.

1055 **C** The degree distribution (distribution of node connectivity) follows a power law as  
1056 demonstrated by a discrete maximum likelihood estimator fit. The great majority of proteins  
1057 have a small number of connections while a few are highly connected (often called hubs).

1058 **D** The distribution of degrees of separation between all protein pairs (i.e. the length of the  
1059 shortest path between all pairs of proteins) indicates that the network fits small-world  
1060 characteristics.

1061 **E** Alternative proteins were found diffusely throughout the network and across the spectrum of  
1062 eigenvector centrality (EVC) (dark lines). EVC is a relative score that indicates the degree of  
1063 influence of nodes on the network; here, altProts display involvement in both influential and  
1064 peripheral regions.

1065 **F** Known protein complexes from the CORUM 3.0 resource (Giurgiu *et al*, 2019) were mapped  
1066 onto the network. Subunit recovery rate confirms the overall validity of the interactions  
1067 confidently identified by the pipeline. All CORUM core complexes for which at least two subunits  
1068 appear as baits in the network were considered.

1069 **G** Selected CORUM complexes are shown with the addition of altProts found in the interaction  
1070 network of baited subunits. Black edges indicate detection in the re-analysis, grey edges indicate  
1071 those only reported by CORUM.

1072

1073 **Figure 3 - Specific features of protein-protein interactions involving preyed alternative**  
1074 **proteins.**

1075 **A** Degree-sorted circular layout of the OpenProt derived full network separated by bait and  
1076 preys. Direct neighbors and neighbors of neighbors (here called second neighborhood) were  
1077 extracted for each altProt. Second neighborhoods of alternative proteins display a variety of  
1078 topologies with some acting as bridges (iv, vi,vii,ix) and others embedded in interconnected  
1079 regions (i-iii, v). Larger nodes represent the proteins for which the second neighborhood was  
1080 extracted.

1081 **B** Second neighborhood of the refProt ELP6 extracted from the network assembled without  
1082 altProts (i) and with altProts (ii). Inclusion of altProts in the network revealed that ELP6 connects  
1083 to 6 additional proteins through its interaction with altProt IP\_688853. Larger nodes represent  
1084 the proteins for which the second neighborhood was extracted.

1085 **C** Detailed second neighborhood of two pseudogene-encoded altProts. (i) GAPDH refProt shows  
1086 9 altProt interactors encoded by pseudogenes of GAPDH. (ii) AltProt encoded by *PHBP19* seen in  
1087 the neighborhood of the PHB refProt. Larger nodes represent the proteins for which the second  
1088 neighborhood was extracted.

1089 **D** (i) AltProt found in the direct interactome of corresponding refProt from parent genes display  
1090 a wide array of sequence similarity to the refProt. Pairs of altProt-refProt from pairs of  
1091 pseudogene-parental genes are slightly closer in the network if their Needleman-Wunch (NW)  
1092 protein sequence global alignment score is higher.

1093 (ii) The distribution of degrees of separation between altProt-refProt pairs of the same gene is  
1094 bimodal with a sub-population (75 %) following a distribution similar to the full network (see  
1095 Figure 2D), and the other placing altProts in the direct neighborhood of refProts from the same  
1096 gene.

1097

1098 **Figure 4 - Protein communities obtained via unsupervised community detection reveal new**  
1099 **members**

1100 **A** Protein communities identified via the Markov clustering algorithm (Enright *et al*, 2002). A  
1101 total of 1045 clusters and 266 connections between them were identified; however, here are  
1102 shown only components of 3 clusters or more for brevity. Nodes represent protein clusters sized  
1103 relative to the number of proteins. Connections between clusters were determined by  
1104 calculating enrichment of links between proteins in pairs of clusters using a hypergeometric test  
1105 with maximal alpha value of 0.05 and correction for multiple testing was applied with 1 % FDR.

1106 **B** Focus on selected clusters showing significant enrichment of gene ontology terms. Enrichment  
1107 was computed against background of whole genome with alpha value set to <0.05 Benjamini-  
1108 Hochberg corrected FDR of 1 %. BP: biological process, MF: molecular function, CC: cellular  
1109 compartment.

1110

1111 **Figure 5 - Communities of proteins with altProt members are associated to disease phenotypes**

1112 **A** Network of association between protein clusters (blue and red nodes) and diseases (yellow  
1113 nodes) from DisGenNet. Gene-disease enrichment was computed for each pair of disease-  
1114 cluster, and associations were deemed significant after hypergeometric test with alpha set to  
1115 0.01 and multiple testing correction set at maximum 1 % FDR.

1116 **B** Disease-cluster associations counted by disease classification (altProt containing clusters as  
1117 red bars, and refProt only clusters as blue bars) and sorted by portion of association involving a  
1118 cluster with altProts (dark red bars).

1119 **C** Focus on clusters with significant disease associations showing involvement of altProts.  
1120 *ADAM10* is a gene associated with tumorigenesis and produces an altProt here detected as part  
1121 of a cluster associated to neoplastic processes (i). Other cluster-disease associations include  
1122 genetic connective tissue diseases involving a pair of proteins encoded by the same gene (ii) and  
1123 a cluster comprising pseudogene derived altProts and parental gene refProt in association with  
1124 another oncological pathology (iii). Cluster #133 (iv) highlights associations of a cluster to both  
1125 rare and common diseases with a community of proteins located at the membrane.

1126

1127 **Figure 6 – Experimental validation of refProt-altProt interactions.**

1128 **A** Validation of FADD and IP\_198808 protein interaction encoded by a bicistronic gene. Left  
1129 panel: Immunoblot of co-immunoprecipitation with GFP-trap sepharose beads performed on  
1130 HEK293 lysates co-expressing Flag-FADD and IP\_198808-GFP or GFP only. Right panel: confocal  
1131 microscopy of HeLa cells co-transfected with IP\_198808-GFP (green channel) and Flag-FADD  
1132 construct immunostained with anti-Flag (red channel).  $r$  = Pearson's correlation. The associated  
1133 Manders' Overlap Coefficients are respectively  $M1 = 0.639$  and  $M2 = 0.931$ .

1134 **B** Validation of eEF1A1 and IP\_624363 protein interaction encoded from a pseudogene/parental  
1135 gene couple. Left panel: immunoblot of co-immunoprecipitation with Anti-FLAG magnetic beads  
1136 performed on HEK293 lysates co-expressing GFP-eEF1A1 and IP\_624363-Flag or pcDNA3.1  
1137 empty vector with IP\_624363-Flag constructs. Right panel: confocal microscopy of HeLa cells co-  
1138 transfected with GFP-eEF1A1 (green channel) and IP\_624363-Flag constructs immunostained

1139 with anti-Flag (red channel).  $r$  = Pearson's correlation. The associated Manders' Overlap  
1140 Coefficients are respectively  $M1= 0.814$  and  $M2 = 0.954$ .

1141 **C** Validation of PHB1 and IP\_762813 protein interaction encoded by a pseudogene/parental  
1142 gene couple. Left panel: immunoblot of co-immunoprecipitation with Anti-FLAG magnetic beads  
1143 performed on HEK293 lysates co-expressing PHB1-GFP and IP\_762813-Flag or pcDNA3.1 empty  
1144 vector with IP\_762813-Flag constructs. Right panel: Comparison of the interaction network of  
1145 IP\_762813-Flag (purple) and PHB1-GFP (blue) from independent affinity purification mass  
1146 spectrometry (AP-MS) of both proteins. 3 independent AP-MS for each protein.

1147 **D** Validation of RPL18 and IP\_117582 protein interaction. Left panel: immunoblot of co-  
1148 immunoprecipitation with Anti-FLAG magnetic beads performed on HEK293 lysates co-  
1149 expressing RPL18-GFP and IP\_117582-Flag or pcDNA3.1 empty vector with IP\_117582-Flag  
1150 constructs. Right panel: confocal microscopy of HeLa cells co-transfected with RPL18-GFP (green  
1151 channel) and IP\_117582-Flag constructs immunostained with anti-Flag (red channel).  $r$  =  
1152 Pearson's correlation. The associated Manders' Overlap Coefficients are respectively  $M1= 0.993$   
1153 and  $M2 = 0.972$ .

1154 All western blots and confocal images are representative of at least 3 independent experiments.  
1155  
1156

1157 **Tables and their legends**

1158

1159 **Table 1 - Terminology definitions**

|               |                                                                                                                                                                         |
|---------------|-------------------------------------------------------------------------------------------------------------------------------------------------------------------------|
| ORF           | Open Reading Frame: sequence of nucleotides bounded by start and stop codons potentially translated into protein by ribosomes.                                          |
| refORF        | Annotated ORF producing a known protein.                                                                                                                                |
| altORF        | Unannotated ORF producing an unknown/unannotated protein. AltORFs can be found on messenger RNAs overlapping refORFs or in untranslated regions, or on non-coding RNAs. |
| refProt       | Annotated protein product resulting from the translation of a refORF.                                                                                                   |
| altProt       | Unannotated protein product resulting from the translation of an altORF with no significant homology with any refProt from the same gene.                               |
| Novel isoform | Unannotated protein product resulting from the translation of an altORF with high homology to a refProt from the same gene.                                             |

1160

1161 **Extended View Tables Footnotes**

1162

1163 ***Table extended view 1 - Transcripts and detected altProts for which at least one peptide***

1164 ***spectrum match was validated via PepQuery.***

1165 <sup>1</sup>Transcript accessions in bold indicate the longest transcript (used downstream for refProt

1166 relative localization).

1167 <sup>2</sup>Biotype that should be assigned given the evidence from the current re-analysis.

1168 <sup>3</sup>If multiple ORFs are present on the transcript and overlap, the transcript is dual coding; if they  
1169 are sequential the transcript is called bicistronic.

1170 <sup>4</sup>Colored rows indicate pseudogene transcripts that are assigned a multi-coding type.

1171

1172 ***Table extended view 2 - Bait-prey pairs involving detected altProts***

1173 <sup>1</sup>A score of 1 indicates that the bait-prey pair constitutes an altProt interacting with the refProt  
1174 of the same gene, with a shortest path length of 1.

1175 <sup>2</sup>A score of 1 indicates that the bait-prey pair constitutes a pseudogene-encoded altProt  
1176 interacting with the refProt of the corresponding parent gene, with a shortest path length of 1.

1177 <sup>3</sup>Set of non-nested (2 aa margin) peptides uniquely mapping to the corresponding altProt.

1178

1179 ***Table extended view 3 – CORUM complexes***

1180 <sup>1</sup>Fraction of subunits recovered in the complex.

1181

1182 ***Table extended view 4 – altProts coded by pseudogenes for which corresponding parent genes***  
1183 ***are annotated in psiCUBE (see Materials and Methods)***

1184 <sup>1</sup> No path indicates that (1) for the pseudogene-encoded altProt, the parent gene-encoded  
1185 refProt was not identified; or (2) that the altProt and the refProt are not part of the same  
1186 component in the network.

1187

## 1188 **Expanded View Figure legends**

1189

### 1190 ***Expanded View 1 - Network assembly details***

1191 **A** Overlap of total proteins (nodes) in BioPlex 2.0 and OpenProt derived networks.

1192 **B** Classifier performance across thresholds. Scores were computed using the BioPlex 2.0

1193 network as ground truth.

1194 **C** The overlap of unfiltered interactions between BioPlex 2.0 and the result of OpenProt 1.6

1195 derived re-analysis was considerable (92 % of re-analysis candidate PPIs) (i). Upon filtration the

1196 overlap is still significant despite the marked smaller size of the OpenProt derived network (59 %

1197 of re-analysis PPIs).

1198 **D** Detailed counts of protein and interaction identifications.

1199

### 1200 ***Expanded View 2 - Community detection details***

1201 **A** Full network of protein clusters. Connections between clusters are drawn if the count of links

1202 between their constituent proteins is deemed enriched via a hypergeometric test with alpha set

1203 to 0.01 and multiple testing correction set at maximum 1 % FDR.

1204 **B** All proteins in the network were either part of a cluster or not and either an altProt or a

1205 refProt.

1206 **C** Distribution of cluster sizes (count of proteins in clusters).

1207 **D** Distribution of cluster connectivity (cluster degree i.e. number of connections a cluster has

1208 with other clusters).

1209

### 1210 ***Expanded View 3 - Validation details***



1211 **A** Validation of interaction between proteins FADD and IP\_198808 encoded by the same mRNA.  
1212 IP\_198808 peptides iii, iv, and v were detected in re-analyses of both ViroTrap and BioPlex 2.0  
1213 AP-MS of FADD. Peptides i and ii were exclusively identified in ViroTrap and BioPlex 2.0 re-  
1214 analyses respectively. Peptides spectra matches (PSMs) for i and v from the ViroTrap dataset  
1215 were validated against unrestricted modifications of reference proteins using PepQuery.

1216 **B** FADD network after re-analysis of ViroTrap mass spectrometry data including IP\_198808  
1217 sequence in the database.

1218 **C** Detailed view of the combined network from AP-MS experiments of PHB refProt and PHBP19  
1219 altProt.

1220 **D** Alignment of IP\_762813 altProt encoded by pseudogene PHBP19 and PHB1 refProt sequences  
1221 based on amino acids using Clustalw with default settings. Blue shading indicates amino acid  
1222 similarity. Unique peptides detected are underlined red.

1223  
1224

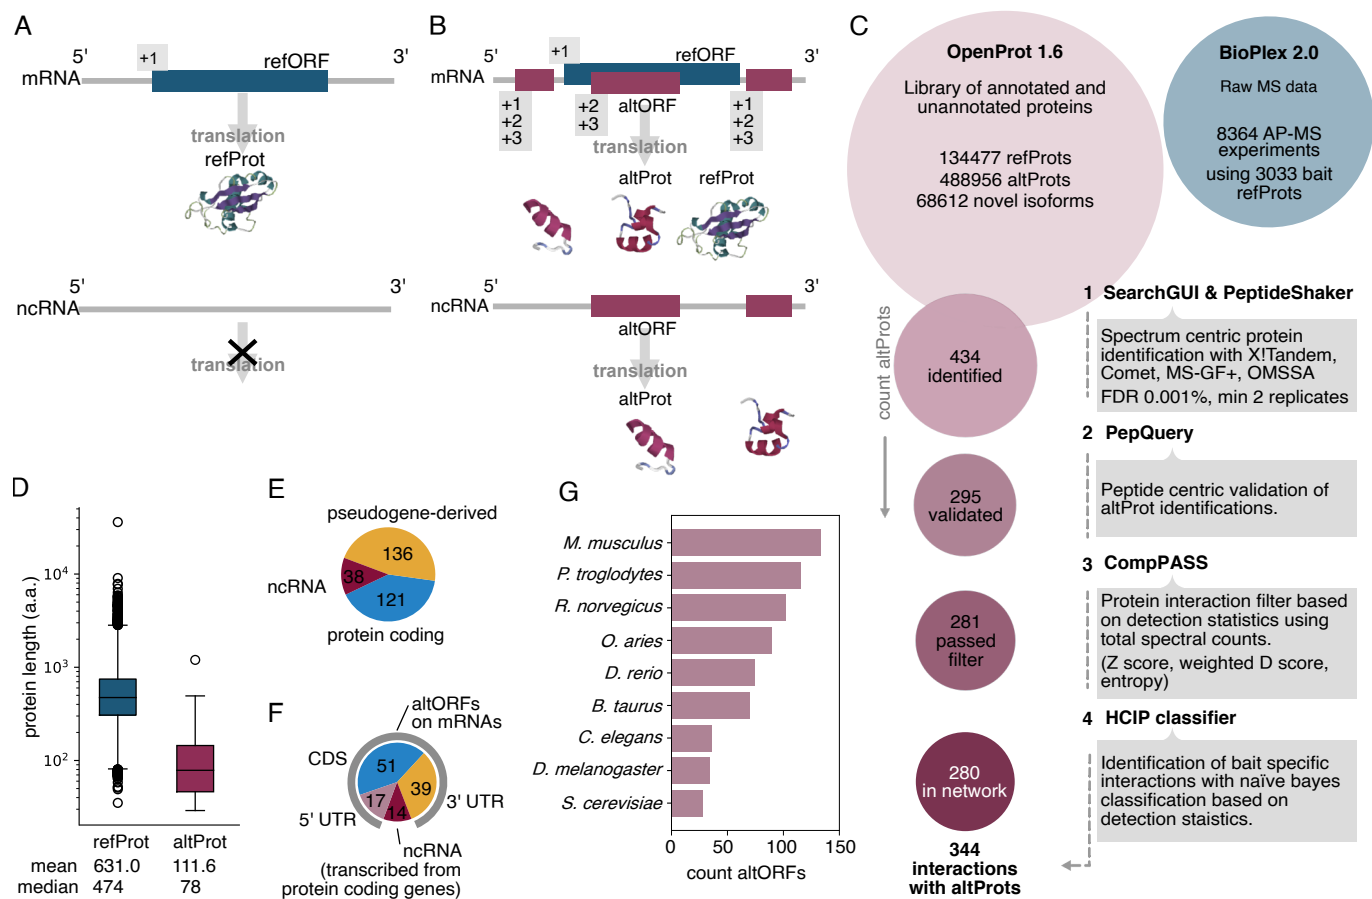

**Figure 1 - Analysis overview and identification of alternative proteins in the human interactome.**

**A-B** The classical model of RNA transcript coding sequence annotation includes only one reference open reading frame (ORF) on mRNAs encoding a reference protein (refProt) and no functional ORF within ncRNAs (A), while the alternative translation model considers multiple proteins encoded in different reading frames in the same transcript including refProts and alternative proteins (altProt)(B).

**C** Our re-analysis pipeline of high throughput AP-MS experiments from BioPlex 2.0 employs stringent criteria to ensure confident identification of both protein detection and interaction detection. Of the 434 altProts initially identified in the dataset, 280 joined the network of protein interactions after filtration.

**D** AltProts are in general shorter than reference proteins. Boxes represent the inter quartile range (IQR) marked at the median and the whiskers are set at 1.5\*IQR over and under the 25th and 75th percentiles.

**E** Identified altProts (295) were encoded by transcripts (455) of a variety of biotypes. 110 of identified altProts are encoded by transcripts of protein coding biotype, 136 by transcripts of pseudogenes, and 58 exclusively by transcripts of non-coding biotype (ncRNA).



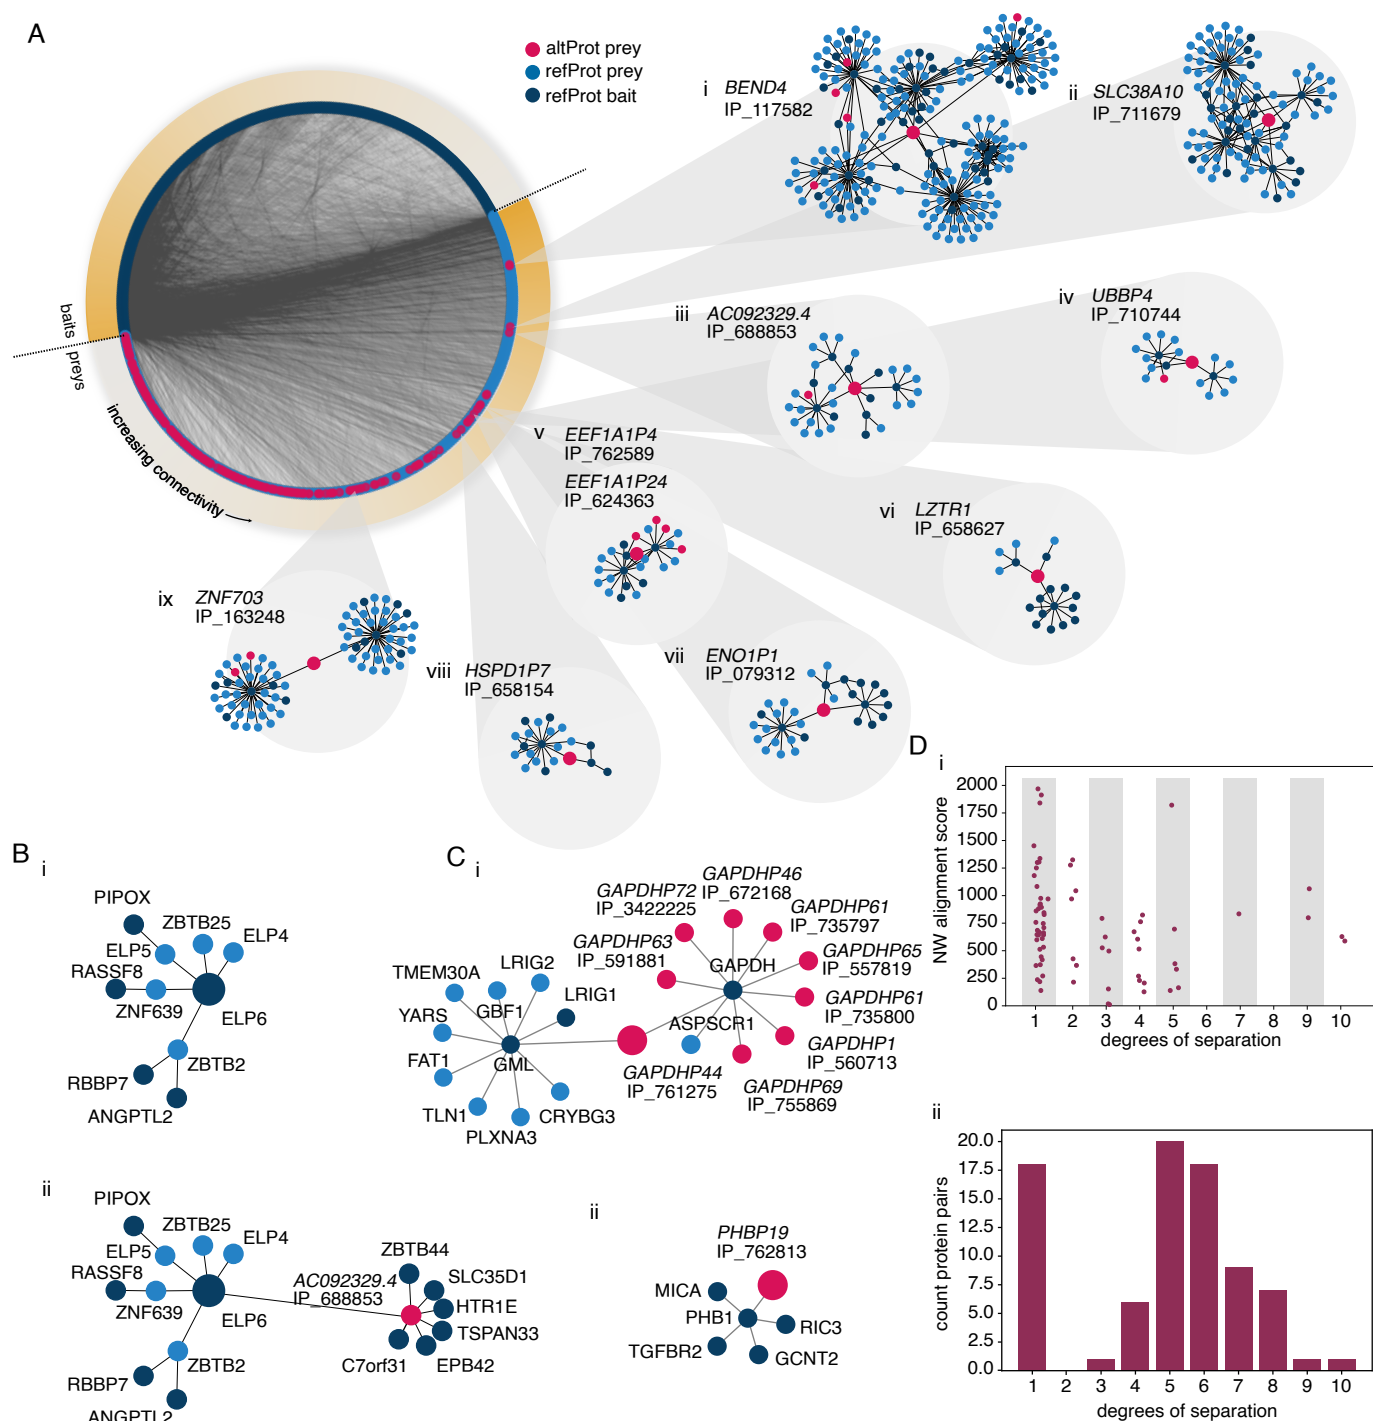

**Figure 3 - Specific features of protein-protein interactions involving preyed alternative proteins.**

**A** Degree-sorted circular layout of the OpenProt derived full network separated by bait and preys. Direct neighbors and neighbors of neighbors (here called second neighborhood) were extracted for each altProt. Second neighborhoods of alternative proteins display a variety of topologies with some acting as bridges (iv, vi, vii, ix) and others embedded in interconnected regions (i-iii, v). Larger nodes represent the proteins for which the second neighborhood was extracted.

**B** Second neighborhood of the refProt ELP6 extracted from the network assembled without altProts (i) and with altProts (ii). Inclusion of altProts in the network revealed that ELP6 connects to 6 additional proteins through its interaction with altProt IP\_688853. Larger nodes represent the proteins for which the second neighborhood was extracted.

**C** Detailed second neighbourhood of two pseudogene encoded altProts. (i) GAPDH refProt shows 9 altProt interactors encoded by pseudogenes of GAPDH. (ii) altProt encoded by PHBP19 seen in the neighborhood of the PHB refProt. Larger nodes represent the proteins for which the second neighborhood was extracted.

**D** (i) AltProt found in the direct interactome of corresponding refProt from parent genes display a wide array of sequence similarity to the refProt. Pairs of altProt-refProt from pairs of pseudogene-parental genes are slightly closer in the network if their Needleman-Wunch (NW) protein sequence global alignment score is higher. (ii) The distribution of degrees of separation between altProt-refProt pairs of the same gene is bimodal with a sub-population (75 %) following a distribution similar to the full network (see Figure 2D), and the other placing altProts in the direct neighborhood of refProts from the same gene.

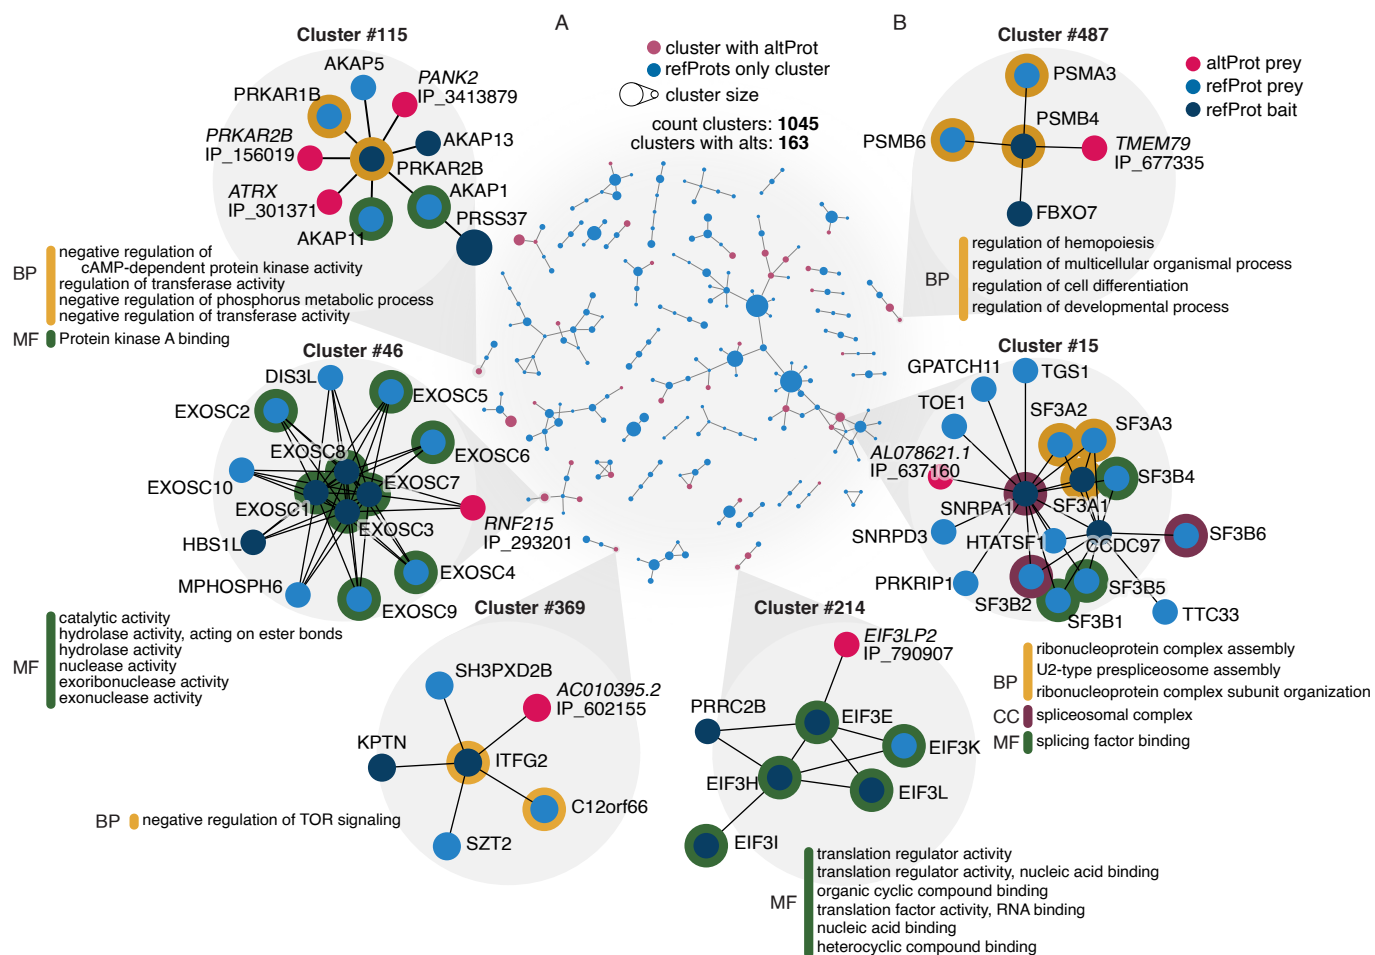

**Figure 4 - Protein communities obtained via unsupervised community detection reveal new members**

**A** Protein communities identified via the Markov clustering algorithm (Enright et al, 2002). A total of 1045 clusters and 266 connections between them were identified; however, here are shown only components of 3 clusters or more for brevity. Nodes represent protein clusters sized relative to the number of proteins. Connections between clusters were determined by calculating enrichment of links between proteins in pairs of clusters using a hypergeometric test with maximal alpha value of 0.05 and correction for multiple testing was applied with 1 % FDR.

**B** Focus on selected clusters showing significant enrichment of gene ontology terms. Enrichment was computed against background of whole genome with alpha value set to <0.05 Benjamini-Hochberg corrected FDR of 1 %. BP: biological process, MF: molecular function, CC: cellular compartment.



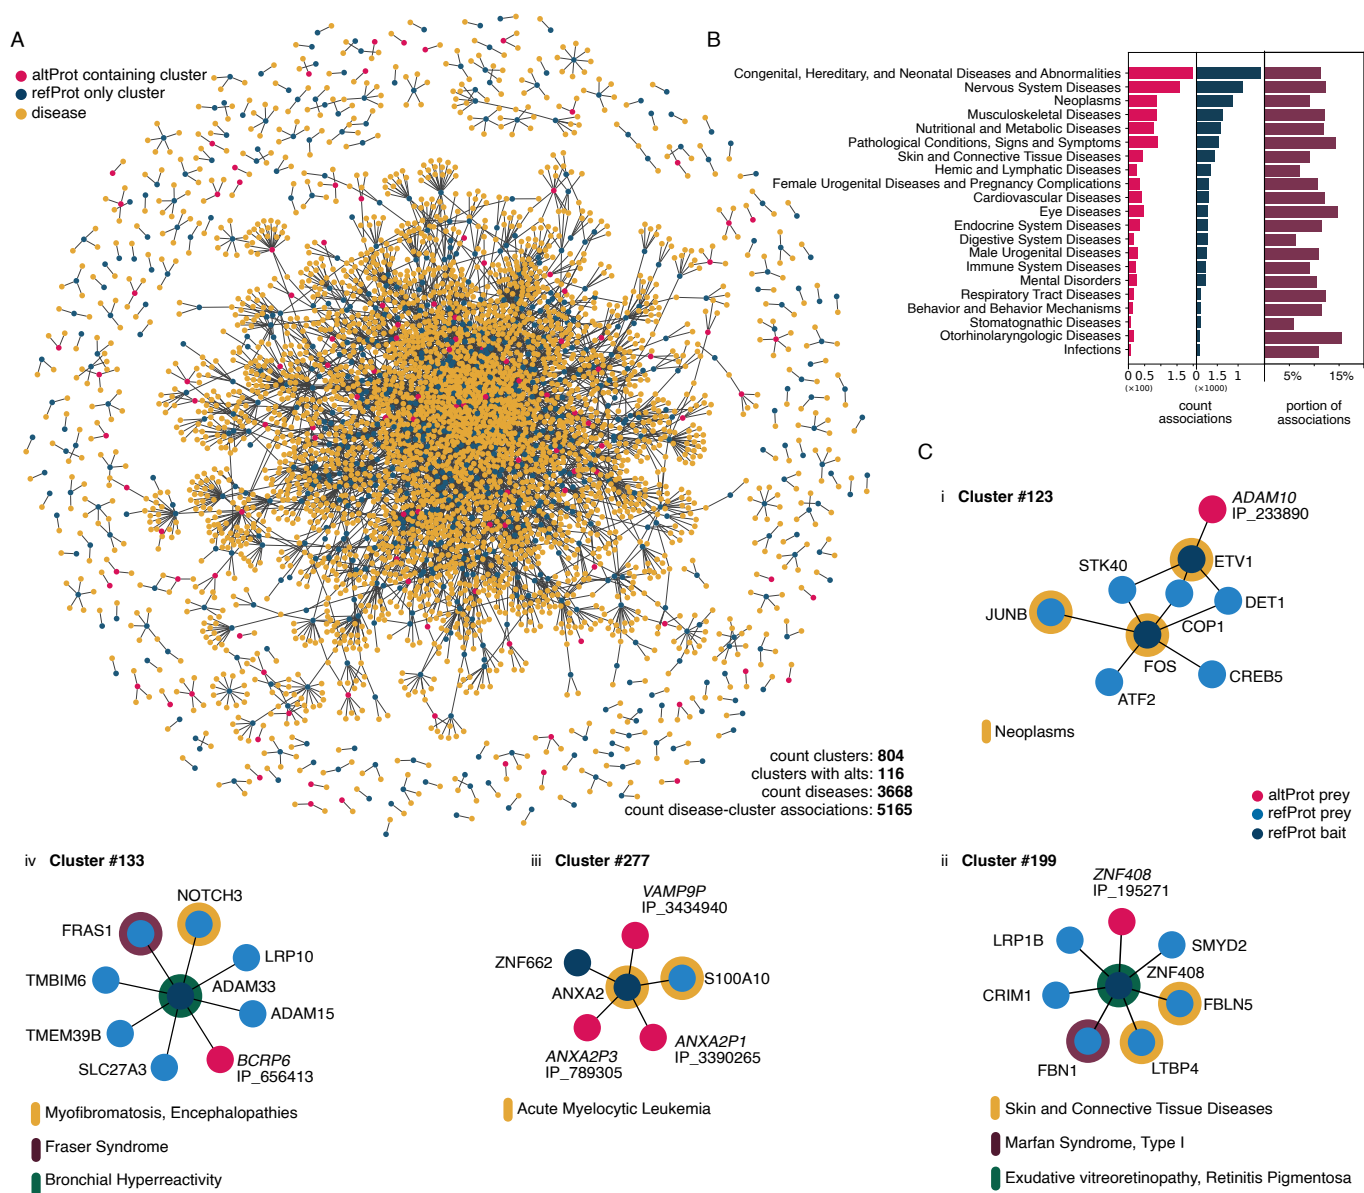

**Figure 5 - Communities of proteins with altProt members are associated to disease phenotypes**

**A** Network of association between protein clusters (blue and red nodes) and diseases (yellow nodes) from DisGenNet. Gene-disease enrichment was computed for each pair of disease-cluster, and associations were deemed significant after hypergeometric test with alpha set to 0.01 and multiple testing correction set at maximum 1 % FDR.

**B** Disease-cluster associations counted by disease classification (altProt containing clusters as red bars, and refProt only clusters as blue bars) and sorted by portion of association involving a cluster with altProts (dark red bars).

**C** Focus on clusters with significant disease associations showing involvement of altProts. ADAM10 is a gene associated with tumorigenesis and produces an altProt here detected as part of a cluster associated to neoplastic processes (i). Other cluster-disease associations include genetic connective tissue diseases involving a pair of proteins encoded by the same gene (ii) and a cluster comprising pseudogene derived altProts and parental gene refProt in association with another oncological pathology (iii). Cluster #133 (iv) highlights associations of a cluster to both rare and common diseases with a community of proteins located at the membrane.

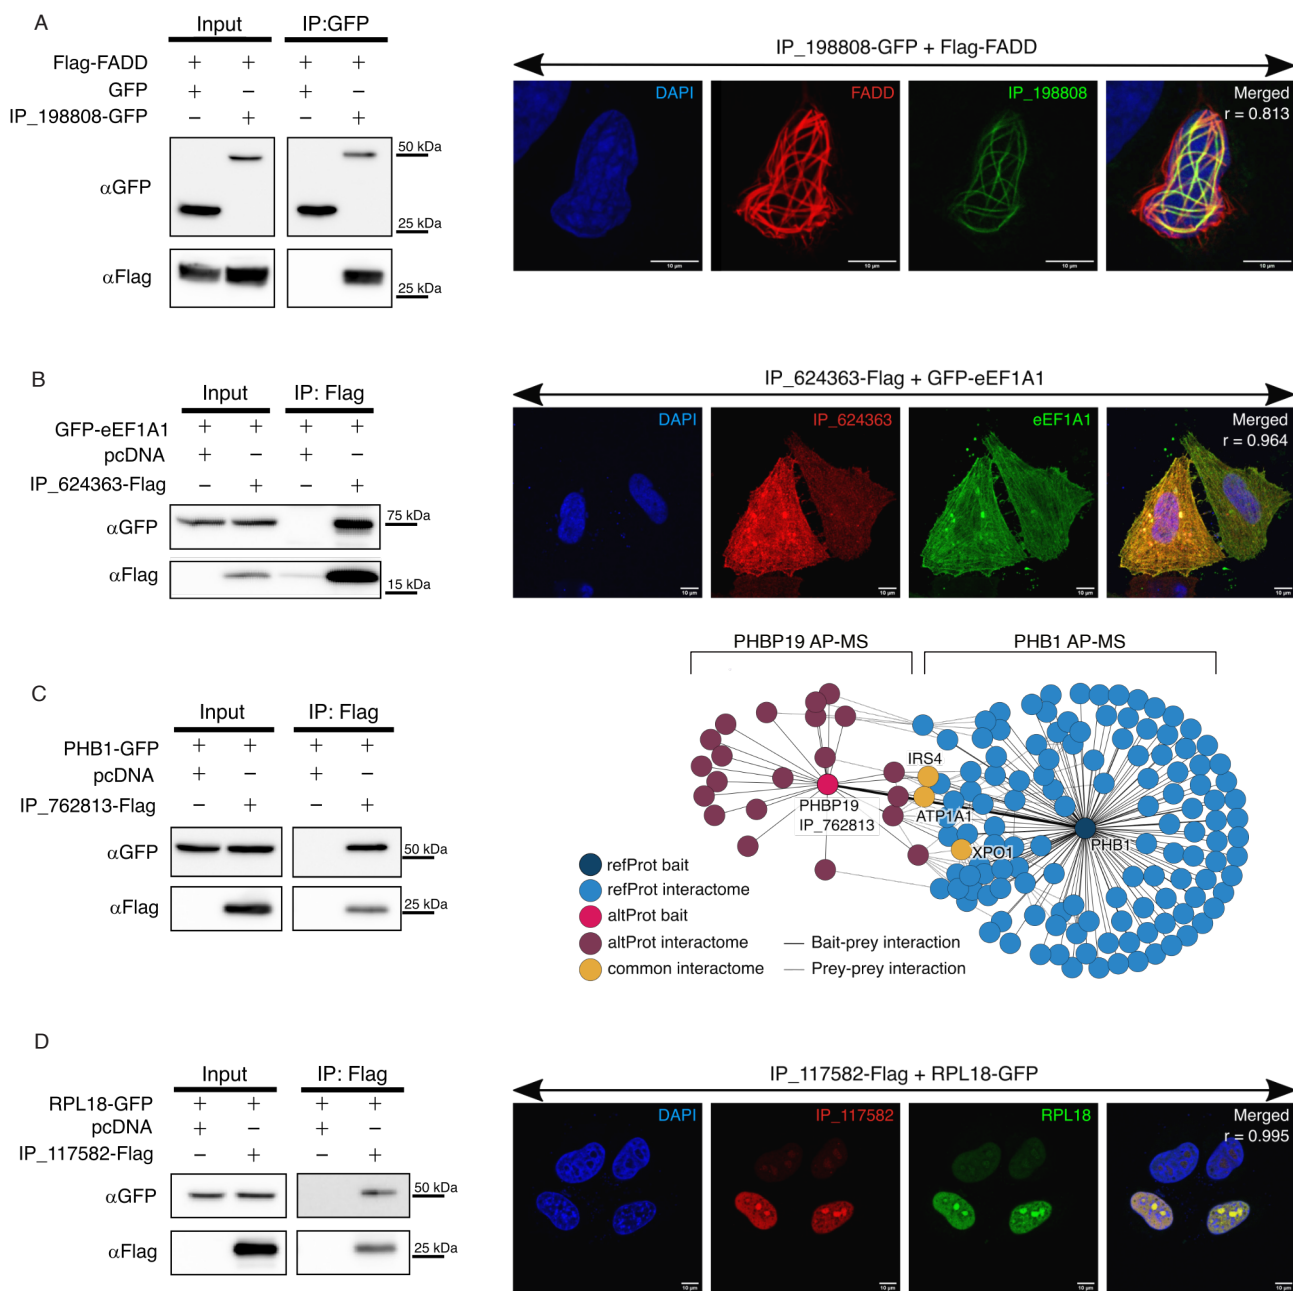

**Figure 6 – Experimental validation of refProt-altProt interactions.**

**A** Validation of FADD and IP\_198808 protein interaction encoded by a bicistronic gene. Left panel: Immunoblot of co-immunoprecipitation with GFP-trap sepharose beads performed on HEK293 lysates co-expressing Flag-FADD and IP\_198808-GFP or GFP only. Right panel: confocal microscopy of HeLa cells co-transfected with IP\_198808-GFP and Flag-FADD construct immunostained with anti-GFP (green channel), anti-Flag (red channel).  $r$  = Pearson's correlation. The associated Manders Correlation Coefficients are respectively  $M1=0.639$  and  $M2=0.931$ .

**B** Validation of eEF1A1 and IP\_624363 protein interaction encoded from a pseudogene/parental gene couple. Left panel: immunoblot of co-immunoprecipitation with Anti-FLAG magnetic beads performed on HEK293 lysates co-expressing GFP-eEF1A1 and IP\_624363-Flag or pcDNA3.1 empty vector with IP\_624363-Flag constructs. Right panel: confocal microscopy of HeLa cells co-transfected with GFP-eEF1A1 and IP\_624363-Flag constructs immunostained with anti-GFP (green channel), anti-Flag (red channel).  $r$  = Pearson's correlation. The associated Manders Correlation Coefficients are respectively  $M1=0.814$  and  $M2=0.954$ .

**C** Validation of PHB1 and IP\_762813 protein interaction encoded by a pseudogene/parental gene couple. Left panel: immunoblot of co-immunoprecipitation with Anti-FLAG magnetic beads performed on HEK293 lysates co-expressing PHB1-GFP and IP\_762813-Flag or pcDNA3.1 empty vector with IP\_762813-Flag constructs. Right panel: Comparison of the interaction network of IP\_762813-Flag (purple) and PHB1-GFP (blue) from independent affinity purification mass spectrometry (AP-MS) of both proteins. 3 independent AP-MS for each protein.

**D** Validation of RPL18 and IP\_117582 protein interaction. Left panel: immunoblot of co-immunoprecipitation with Anti-FLAG magnetic beads performed on HEK293 lysates co-expressing RPL18-GFP and IP\_117582-Flag or pcDNA3.1 empty vector with IP\_117582-Flag constructs. Right panel: confocal microscopy of HeLa cells co-transfected with RPL18-GFP and IP\_117582-Flag constructs immunostained with anti-GFP (green channel), anti-Flag (red channel).  $r$  = Pearson's correlation. The associated Manders Correlation Coefficients are respectively  $M1=0.993$  and  $M2=0.972$ .

All western blots and confocal images are representative of at least 3 independent experiments.

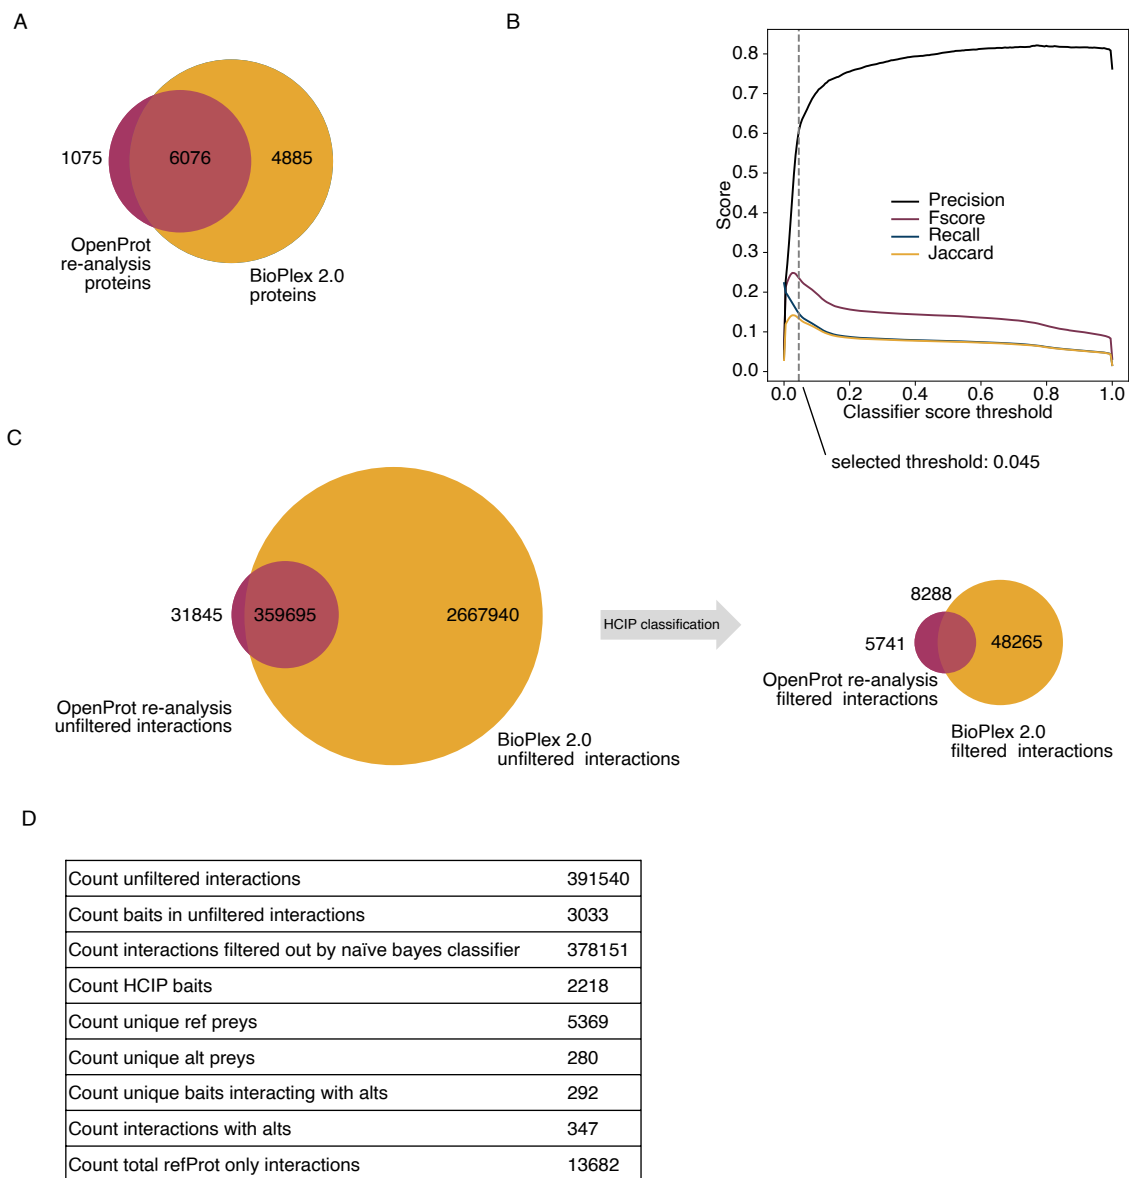

### Expanded View 1 - Network assembly details

**A** Overlap of total proteins (nodes) in BioPlex 2.0 and OpenProt derived networks.

**B** Classifier performance across thresholds. Scores were computed using the BioPlex 2.0 network as ground truth.

**C** The overlap of unfiltered interactions between BioPlex 2.0 and the result of OpenProt 1.6 derived re-analysis was considerable (92 % of re-analysis candidate PPIs) (i). Upon filtration the overlap is still significant despite the marked smaller size of the OpenProt derived network (59 % of re-analysis PPIs).

**D** Detailed counts of protein and interaction identifications.



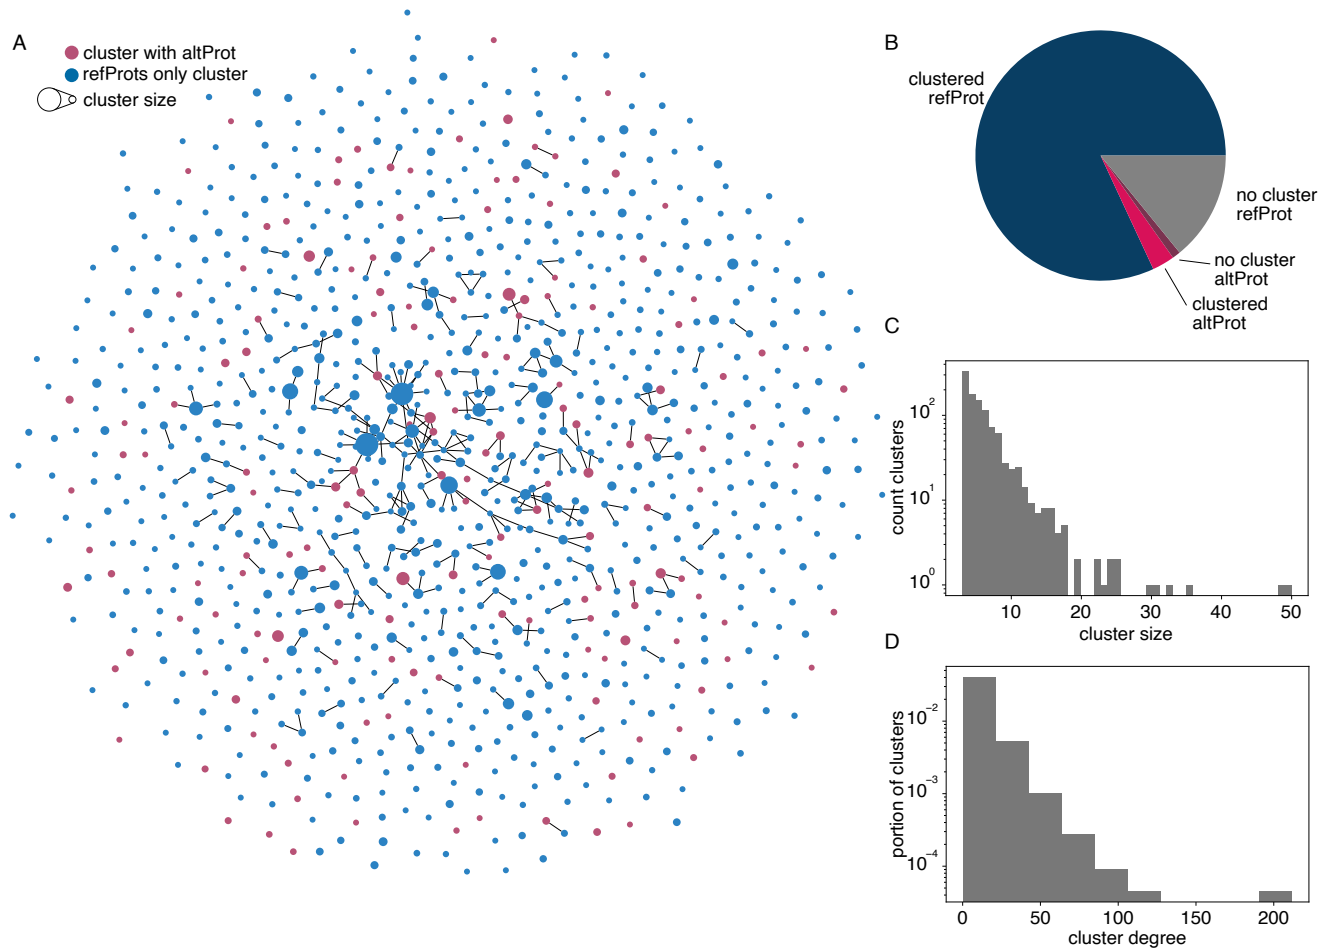

### Expanded View 2 - Community detection details

**A** Full network of protein clusters. Connections between clusters are drawn if the count of links between their constituent proteins is deemed enriched via a hypergeometric test with alpha set to 0.01 and multiple testing correction set at maximum 1% FDR.

**B** All proteins in the network were either part of a cluster or not and either an altProt or a refProt.

**C** Distribution of cluster sizes (count of proteins in clusters).

**D** Distribution of cluster connectivity (cluster degree i.e. number of connections a cluster has with other clusters).

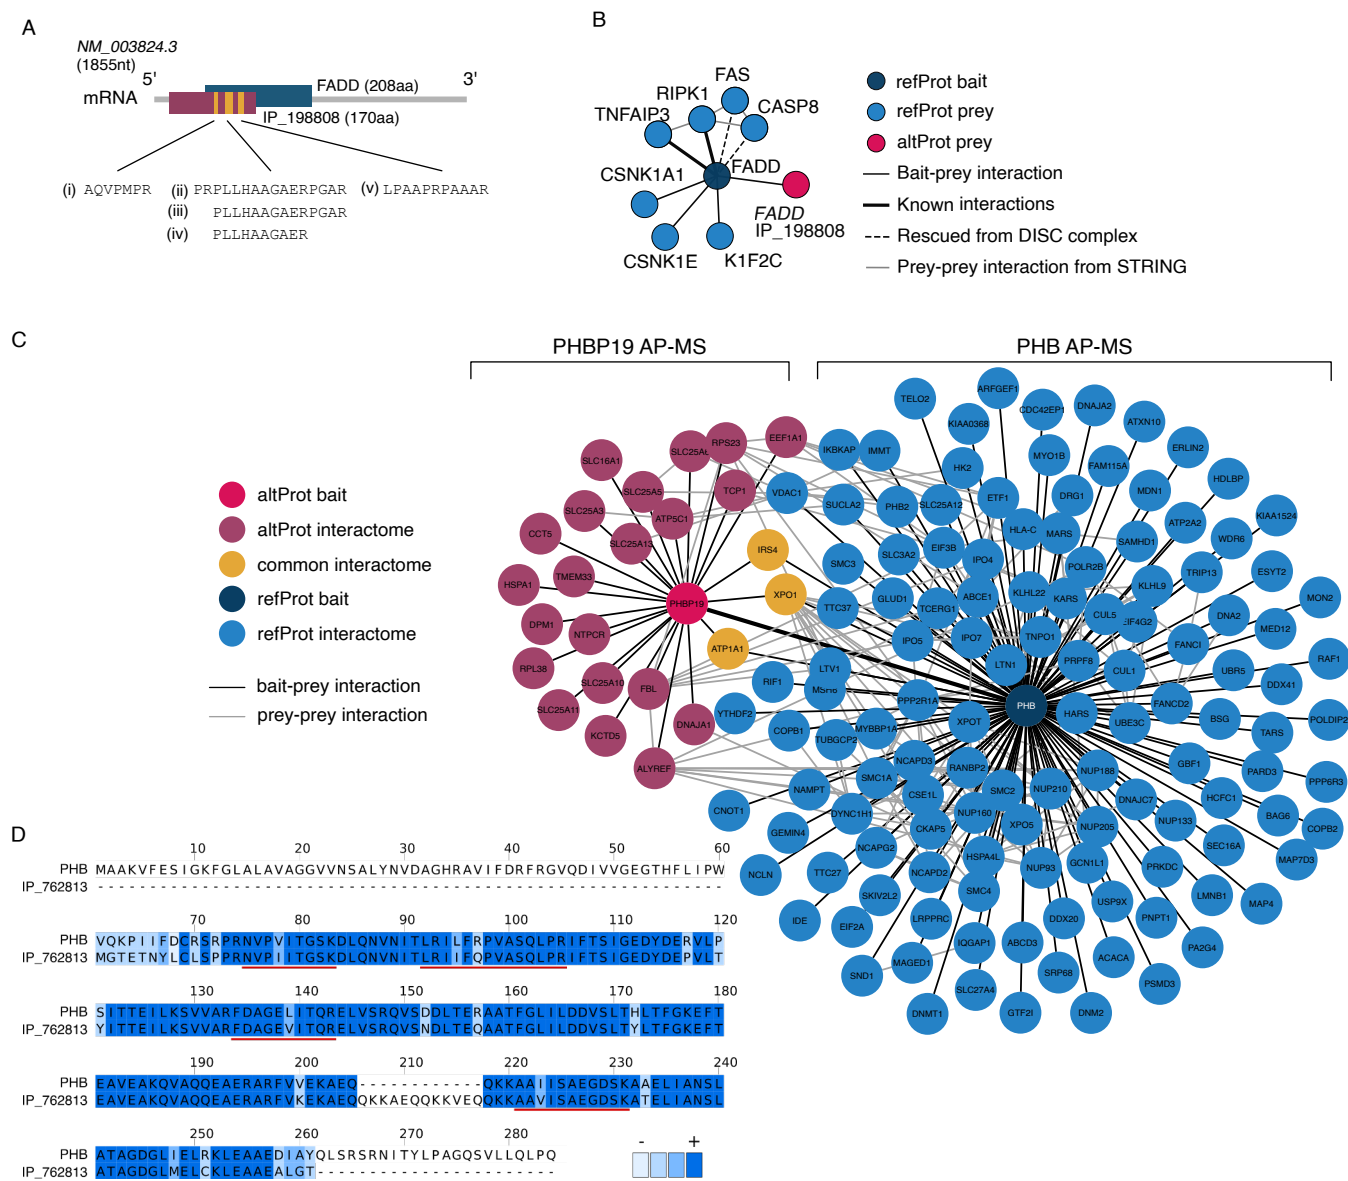

### Expanded View 3 - Validation details

**A** Validation of interaction between proteins FADD and IP\_198808 encoded by the same mRNA. IP\_198808 peptides iii, iv, and v were detected in re-analyses of both ViroTrap and BioPlex 2.0 AP-MS of FADD. Peptides i and ii were exclusively identified in ViroTrap and BioPlex 2.0 re-analyses respectively. Peptides spectra matches (PSMs) for i and v from the ViroTrap dataset were validated against unrestricted modifications of reference proteins using PepQuery.

**B** FADD network after re-analysis of ViroTrap mass spectrometry data including IP\_198808 sequence in the database.

**C** Detailed view of the combined network from AP-MS experiments of PHB refProt and PHBP19 altProt.

**D** Alignment of IP\_762813 altProt encoded by pseudogene PHBP19 and PHB1 refProt sequences based on amino acids using Clustal $\omega$  with default settings. Blue shading indicates amino acid similarity. Unique peptides detected are underlined red.
